# Supplementary material
Source: PubMed Central journal article supplement (PMC2584607)

**Dual Roles of Glycosyl Torsion Angle Conformation and Stereochemical Configuration in Butadiene Oxide-Derived N1  $\beta$ -Hydroxyalkyl Deoxyinosine Adducts: A Structural Perspective<sup>†</sup>**

Revised Manuscript

Supporting Information

W. Keither Merritt, Agnieszka Kowalczyk, Tandace A. Scholdberg, Stephen M. Dean, Thomas M. Harris, Constance M. Harris, R. Stephen Lloyd, and Michael P. Stone\*  
Department of Chemistry, Center in Molecular Toxicology, Vanderbilt-Ingram Cancer Center, Vanderbilt University, Nashville, Tennessee 37235

<sup>¶</sup>Current Address for Tandace Scholdberg: University of Kansas, Department of Medicinal Chemistry, Life Sciences Research Laboratories 1501 Wakarusa, Lawrence, KS 66047  
<sup>§</sup>Current Address for Lubomir Nechev: Alnylam Pharmaceuticals, 790 Memorial Drive Suite 202, Cambridge, MA 02139.

<sup>‡</sup>Center for Research on Environmental and Occupational Toxicology, Oregon Health and Science University, 3181 SW Sam Jackson Park Road, L606, Portland, OR 97239-3098

\*Author to whom correspondence should be addressed. Telephone 615-322-2589; FAX 615-322-7591; email michael.p.stone@vanderbilt.edu

Running Title: Butadiene Oxide-Derived Inosine N1 Adduct

<sup>†</sup>This work was supported by NIH grant ES-05509 (M.P.S.). Funding for the NMR spectrometers was supplied by Vanderbilt University; by NIH grant RR-05805, and the Vanderbilt Center in Molecular Toxicology, ES-00267. The Vanderbilt-Ingram Cancer Center is supported by NIH grant CA-68485.

Table S1. <sup>1</sup>H NMR Assignments for the *ras6l* R-N1-BDO-(61,2) adduct.

|                 | H1'  | H2'  | H2'' | H3'  | H4'  | H5'  | H5'' | H8   | H6   | CH <sub>3</sub> | H5   | H2   |
|-----------------|------|------|------|------|------|------|------|------|------|-----------------|------|------|
| C <sup>1</sup>  | 5.45 | 1.58 | 2.08 | 4.42 |      |      |      |      | 7.02 |                 | 5.10 |      |
| G <sup>2</sup>  | 5.13 | 2.43 | 2.54 | 4.79 | 4.01 | 3.79 | 3.68 | 7.37 |      |                 |      |      |
| G <sup>3</sup>  | 5.44 | 2.54 | 2.43 | 4.16 | 3.84 | 3.92 | 3.95 | 7.28 |      |                 |      |      |
| A <sup>4</sup>  | 5.93 | 2.34 | 2.58 | 4.78 |      |      |      | 7.59 |      |                 |      | 7.38 |
| C <sup>5</sup>  | 5.55 | 1.64 | 1.76 | 4.51 | 3.83 | 3.73 | 3.71 |      | 6.63 |                 | 4.71 |      |
| X <sup>6</sup>  | 5.32 | 1.95 | 2.43 | 4.57 |      |      |      | 7.20 |      |                 |      | 7.31 |
| A <sup>7</sup>  | 5.27 | 2.60 | 2.32 |      | 4.03 | 3.68 |      | 7.63 |      |                 |      | 6.85 |
| G <sup>8</sup>  | 5.00 | 2.30 | 2.36 |      |      |      |      | 7.20 |      |                 |      |      |
| A <sup>9</sup>  | 5.67 | 2.40 | 2.62 | 4.78 | 3.84 | 3.91 | 3.94 | 7.57 |      |                 |      |      |
| A <sup>10</sup> | 5.75 | 2.30 | 2.61 | 4.76 | 4.17 | 3.94 |      | 7.49 |      |                 |      | 6.83 |
| G <sup>11</sup> | 5.71 | 2.08 | 1.97 | 4.33 | 4.00 | 3.85 | 3.91 | 7.02 |      |                 |      |      |
|                 |      |      |      |      |      |      |      |      |      |                 |      |      |
| C <sup>12</sup> | 5.61 | 2.06 | 2.35 | 4.39 | 3.85 | 3.59 | 3.53 |      | 7.30 |                 | 5.38 |      |
| T <sup>13</sup> | 5.95 | 2.02 | 2.40 | 4.66 | 4.02 | 3.84 | 3.84 |      | 7.14 | 1.41            |      |      |
| T <sup>14</sup> | 5.91 | 1.98 | 2.34 |      | 3.89 | 3.97 | 3.93 |      | 6.94 | 1.40            |      |      |
| C <sup>15</sup> | 5.75 | 2.19 | 1.84 | 4.59 | 4.00 | 3.92 | 3.88 |      | 7.07 |                 | 5.13 |      |
| T <sup>16</sup> | 5.89 | 2.12 | 1.90 | 4.65 | 3.81 | 3.87 | 3.91 |      | 6.83 | 1.46            |      |      |
| T <sup>17</sup> | 5.42 | 1.56 | 1.85 | 4.49 | 3.72 | 3.83 |      |      | 6.68 | 1.34            |      |      |
| G <sup>18</sup> | 5.64 | 2.49 | 2.56 |      | 4.07 | 3.71 | 3.78 | 7.46 |      |                 |      |      |
| T <sup>19</sup> | 5.81 | 1.97 | 2.27 | 4.61 | 3.98 | 3.87 | 3.91 |      | 6.80 | 1.15            |      |      |
| C <sup>20</sup> | 5.71 | 1.87 | 2.16 | 4.56 |      |      |      |      | 7.03 |                 | 5.32 |      |
| C <sup>21</sup> | 5.31 | 1.76 | 2.08 | 4.56 | 3.85 | 3.82 | 3.78 |      | 6.96 |                 | 5.16 |      |
| G <sup>22</sup> | 5.93 | 2.39 | 2.10 | 4.43 | 3.93 | 3.8  | 3.84 | 7.42 |      |                 |      |      |

Table S2. NOE Restraints Used in the rMD Calculations for the *ras6l* R-N1-BDO-(61,2) adduct.

```

#
# 1  CYT  H3'  1  CYT  H6  4.23  5.17
&rst
ixpk= 0, nxpk= 0, iat= 24, 13, r1= 3.73, r2= 4.23, r3= 5.17, r4= 5.67, &end
#
# 1  CYT  H3'  1  CYT  H2'  2.12  2.58
&rst
ixpk= 0, nxpk= 0, iat= 24, 26, r1= 1.62, r2= 2.12, r3= 2.58, r4= 3.08, &end
#
# 1  CYT  H2'2  1  CYT  H2'  1.58  2.02
&rst
ixpk= 0, nxpk= 0, iat= 27, 26, r1= 1.08, r2= 1.58, r3= 2.02, r4= 2.52, &end
#
# 2  GUA  H8  1  CYT  H6  4.54  5.56
&rst
ixpk= 0, nxpk= 0, iat= 43, 13, r1= 4.04, r2= 4.54, r3= 5.56, r4= 6.06, &end
#
# 2  GUA  H8  1  CYT  H2'  3.36  4.1
&rst
ixpk= 0, nxpk= 0, iat= 43, 26, r1= 2.86, r2= 3.36, r3= 4.10, r4= 4.60, &end
#
# 1  CYT  H1'  2  GUA  H8  5.81  7.11
&rst
ixpk= 0, nxpk= 0, iat= 10, 43, r1= 5.31, r2= 5.81, r3= 7.11, r4= 7.61, &end
#

```

```

# 1   CYT  H1'   2   GUA  H5'2  4   6
&rst
ixpk= 0, nxpk= 0, iat= 10, 35, r1= 3.50, r2= 4.00, r3= 6.00, r4= 6.50, &end
#
# 2   GUA  H8    2   GUA  H1'   3.77  4.61
&rst
ixpk= 0, nxpk= 0, iat= 43, 40, r1= 3.27, r2= 3.77, r3= 4.61, r4= 5.11, &end
#
# 2   GUA  H3'   2   GUA  H2'   2.29  2.79
&rst
ixpk= 0, nxpk= 0, iat= 57, 59, r1= 1.79, r2= 2.29, r3= 2.79, r4= 3.29, &end
#
# 2   GUA  H2'2  2   GUA  H1'   2.02  2.58
&rst
ixpk= 0, nxpk= 0, iat= 60, 40, r1= 1.52, r2= 2.02, r3= 2.58, r4= 3.08, &end
#
# 2   GUA  H4'   2   GUA  H8    4.97  6.33
&rst
ixpk= 0, nxpk= 0, iat= 37, 43, r1= 4.47, r2= 4.97, r3= 6.33, r4= 6.83, &end
#
# 2   GUA  H8    2   GUA  H5'   4.7   5.9
&rst
ixpk= 0, nxpk= 0, iat= 43, 34, r1= 4.20, r2= 4.70, r3= 5.90, r4= 6.40, &end
#
# 2   GUA  H8    2   GUA  H5'2  6.03  7.37
&rst
ixpk= 0, nxpk= 0, iat= 43, 35, r1= 5.53, r2= 6.03, r3= 7.37, r4= 7.87, &end

```

```

#
# 2   GUA  H4'   2   GUA  H1'   2.92  3.56
&rst
ixpk= 0, nxpk= 0, iat= 37, 40, r1= 2.42, r2= 2.92, r3= 3.56, r4= 4.06, &end
#
# 2   GUA  H1'   2   GUA  H5'2  4.85  6.15
&rst
ixpk= 0, nxpk= 0, iat= 40, 35, r1= 4.35, r2= 4.85, r3= 6.15, r4= 6.65, &end
#
# 3   GUA  H8    2   GUA  H1'   3.82  4.66
&rst
ixpk= 0, nxpk= 0, iat= 76, 40, r1= 3.32, r2= 3.82, r3= 4.66, r4= 5.16, &end
#
# 3   GUA  H8    2   GUA  H3'   4.12  4.88 change
&rst
ixpk= 0, nxpk= 0, iat= 76, 57, r1= 3.62, r2= 4.12, r3= 5.00, r4= 5.38, &end
#
# 3   GUA  H3'   2   GUA  H1'   5.42  6.62
&rst
ixpk= 0, nxpk= 0, iat= 90, 40, r1= 4.92, r2= 5.42, r3= 6.62, r4= 7.12, &end
#
# 3   GUA  H5'   2   GUA  H1'   4.42  5.58 change
&rst
ixpk= 0, nxpk= 0, iat= 67, 40, r1= 3.92, r2= 4.22, r3= 5.58, r4= 6.08, &end
#
# 3   GUA  H4'   2   GUA  H1'   5.11  6.25
&rst

```

```

ixpk= 0, nxpk= 0, iat= 70, 40, r1= 4.61, r2= 5.11, r3= 6.25, r4= 6.75, &end
#
# 3   GUA  H1'   3   GUA  H8   3.31  4.05
&rst
ixpk= 0, nxpk= 0, iat= 73, 76, r1= 2.81, r2= 3.31, r3= 4.05, r4= 4.55, &end
#
# 3   GUA  H3'   3   GUA  H8   4.46  5.44 change
&rst
ixpk= 0, nxpk= 0, iat= 90, 76, r1= 3.96, r2= 4.16, r3= 5.44, r4= 5.94, &end
#
# 3   GUA  H8    3   GUA  H4'   5.2   6.8
&rst
ixpk= 0, nxpk= 0, iat= 76, 70, r1= 4.70, r2= 5.20, r3= 6.80, r4= 7.30, &end
#
# 3   GUA  H8    3   GUA  H5'   4.84  6.16
&rst
ixpk= 0, nxpk= 0, iat= 76, 67, r1= 4.34, r2= 4.84, r3= 6.16, r4= 6.66, &end
#
# 3   GUA  H5'2  3   GUA  H8   4.43  5.41
&rst
ixpk= 0, nxpk= 0, iat= 68, 76, r1= 3.93, r2= 4.43, r3= 5.41, r4= 5.91, &end
#
# 3   GUA  H1'   3   GUA  H3'   3.15  3.85
&rst
ixpk= 0, nxpk= 0, iat= 73, 90, r1= 2.65, r2= 3.15, r3= 3.85, r4= 4.35, &end
#
# 4   ADE  H1'   3   GUA  H3'   3.5   4.1

```

```

# &rst
# ixpk= 0, nxpk= 0, iat= 106, 90, r1= 3.00, r2= 3.50, r3= 4.10, r4= 4.60, &end
#
# 4   ADE  H1'   3   GUA  H3'   2.74  3.34
# &rst
# ixpk= 0, nxpk= 0, iat= 106, 90, r1= 2.24, r2= 2.74, r3= 3.34, r4= 3.84, &end
#
# 4   ADE  H8    3   GUA  H8    4.69  5.73
&rst
ixpk= 0, nxpk= 0, iat= 109, 76, r1= 4.19, r2= 4.69, r3= 5.73, r4= 6.23, &end
#
# 3   GUA  H1'   4   ADE  H8    3.04  4.04
&rst
ixpk= 0, nxpk= 0, iat= 73, 109, r1= 2.54, r2= 3.04, r3= 4.04, r4= 4.54, &end
#
# 4   ADE  H8    4   ADE  H1'   3.37  4.43
&rst
ixpk= 0, nxpk= 0, iat= 109, 106, r1= 2.87, r2= 3.37, r3= 4.43, r4= 4.93, &end
#
# 4   ADE  H3'   4   ADE  H1'   6.07  7.41
# &rst
# ixpk= 0, nxpk= 0, iat= 122, 106, r1= 5.57, r2= 6.07, r3= 7.41, r4= 7.91, &end
#
# 4   ADE  H2'   4   ADE  H1'   2.77  3.23
&rst
ixpk= 0, nxpk= 0, iat= 124, 106, r1= 2.27, r2= 2.77, r3= 3.23, r4= 3.73, &end
#

```

```

# 4   ADE  H2   4   ADE  H1'  4.12  5.04
&rst
ixpk= 0, nxpk= 0, iat= 118, 106, r1= 3.62, r2= 4.12, r3= 5.04, r4= 5.54, &end
#
# 5   CYT  H6   4   ADE  H1'  3.3   4.04
&rst
ixpk= 0, nxpk= 0, iat= 141, 106, r1= 2.80, r2= 3.30, r3= 4.04, r4= 4.54, &end
#
# 5   CYT  H6   4   ADE  H3'  5.27  6.43
&rst
ixpk= 0, nxpk= 0, iat= 141, 122, r1= 4.77, r2= 5.27, r3= 6.43, r4= 6.93, &end
#
# 5   CYT  H1'  4   ADE  H1'  4.86  6.14
&rst
ixpk= 0, nxpk= 0, iat= 138, 106, r1= 4.36, r2= 4.86, r3= 6.14, r4= 6.64, &end
#
# 5   CYT  H5   4   ADE  H1'  5.18  6.34
&rst
ixpk= 0, nxpk= 0, iat= 143, 106, r1= 4.68, r2= 5.18, r3= 6.34, r4= 6.84, &end
#
# 5   CYT  H6   4   ADE  H8   3.83  4.69  change
&rst
ixpk= 0, nxpk= 0, iat= 141, 109, r1= 3.33, r2= 3.83, r3= 4.99, r4= 5.19, &end
#
# 5   CYT  H6   4   ADE  H2'2  3.13  3.83  change
&rst
ixpk= 0, nxpk= 0, iat= 141, 125, r1= 2.63, r2= 2.93, r3= 3.83, r4= 4.33, &end

```



```

#
# 5   CYT  H6   4   ADE  H2'  3.55  4.33
&rst
  ixpk= 0, nxpk= 0, iat= 141, 124, r1= 3.05, r2= 3.55, r3= 4.33, r4= 4.83, &end
#
# 5   CYT  H1'  4   ADE  H2   3.79  4.63
&rst
  ixpk= 0, nxpk= 0, iat= 138, 118, r1= 3.29, r2= 3.79, r3= 4.63, r4= 5.13, &end
#
# 5   CYT  H5   4   ADE  H2'2  3.22  3.94
&rst
  ixpk= 0, nxpk= 0, iat= 143, 125, r1= 2.72, r2= 3.22, r3= 3.94, r4= 4.44, &end
#
# 19  THY  H1'  4   ADE  H2   4.57  5.59
# &rst
# ixpk= 0, nxpk= 0, iat= 592, 118, r1= 4.07, r2= 4.57, r3= 5.59, r4= 6.09, &end
#
# 5   CYT  H6   5   CYT  H1'  3.79  4.63
&rst
  ixpk= 0, nxpk= 0, iat= 141, 138, r1= 3.29, r2= 3.79, r3= 4.63, r4= 5.13, &end
#
# 5   CYT  H5   5   CYT  H6   2.2   2.68
&rst
  ixpk= 0, nxpk= 0, iat= 143, 141, r1= 1.70, r2= 2.20, r3= 2.68, r4= 3.18, &end
#
# 5   CYT  H3'  5   CYT  H6   2.74  3.36  change
&rst

```

```

ixpk= 0, nxpk= 0, iat= 152, 141, r1= 2.24, r2= 2.74, r3= 3.86, r4= 4.00, &end
#
# 5   CYT  H5'   5   CYT  H6   4.15  5.07
&rst
ixpk= 0, nxpk= 0, iat= 132, 141, r1= 3.65, r2= 4.15, r3= 5.07, r4= 5.57, &end
#
# 5   CYT  H4'   5   CYT  H6   4.72  5.88
&rst
ixpk= 0, nxpk= 0, iat= 135, 141, r1= 4.22, r2= 4.72, r3= 5.88, r4= 6.38, &end
#
# 5   CYT  H5    5   CYT  H1'  4.86  6.34
&rst
ixpk= 0, nxpk= 0, iat= 143, 138, r1= 4.36, r2= 4.86, r3= 6.34, r4= 6.84, &end
#
# 5   CYT  H3'   5   CYT  H1'  3.37  4.13
&rst
ixpk= 0, nxpk= 0, iat= 152, 138, r1= 2.87, r2= 3.37, r3= 4.13, r4= 4.63, &end
#
# 5   CYT  H3'   5   CYT  H5    5.92  7.24
&rst
ixpk= 0, nxpk= 0, iat= 152, 143, r1= 5.42, r2= 5.92, r3= 7.24, r4= 7.74, &end
#
# 5   CYT  H4'   5   CYT  H1'  4.86  5.94
# &rst
# ixpk= 0, nxpk= 0, iat= 135, 138, r1= 4.36, r2= 4.86, r3= 5.94, r4= 6.44, &end
#
# 5   CYT  H5'   5   CYT  H1'  2.32  2.84

```

```

# &rst
# ixpk= 0, nxpk= 0, iat= 132, 138, r1= 1.82, r2= 2.32, r3= 2.84, r4= 3.34, &end
#
# 5   CYT  H2'   5   CYT  H5   3.73  4.55
&rst
  ixpk= 0, nxpk= 0, iat= 154, 143, r1= 3.23, r2= 3.73, r3= 4.55, r4= 5.05, &end
#
# 5   CYT  H2'2  5   CYT  H5   4.91  5.99
&rst
  ixpk= 0, nxpk= 0, iat= 155, 143, r1= 4.41, r2= 4.91, r3= 5.99, r4= 6.49, &end
#
# 6   N1R  H8    5   CYT  H1'   5.49  6.51  change
&rst
  ixpk= 0, nxpk= 0, iat= 195, 138, r1= 4.99, r2= 5.35, r3= 5.50, r4= 6.00,
&end
#
# 6   N1R  H8    5   CYT  H3'   5.86  7.16  CHANGE
&rst
  ixpk= 0, nxpk= 0, iat= 195, 152, r1= 5.36, r2= 5.86, r3= 8.56, r4= 8.66,
&end
#
# 6   N1R  H8    5   CYT  H2'2  5.91  7.23
&rst
  ixpk= 0, nxpk= 0, iat= 195, 155, r1= 5.41, r2= 5.91, r3= 7.23, r4= 7.73, &end
#
# 6   N1R  H8    5   CYT  H2'   5.85  7.15
&rst

```

```

ixpk= 0, nxpk= 0, iat= 195, 154, r1= 5.35, r2= 5.85, r3= 7.15, r4= 7.65, &end
#
# 6  N1R  H5'2  5  CYT  H1'  4.31  5.27
&rst
ixpk= 0, nxpk= 0, iat= 162, 138, r1= 3.81, r2= 4.31, r3= 5.27, r4= 5.77, &end
#
# 6  N1R  H8  6  N1R  HAA  2.23  2.33  change
&rst
ixpk= 0, nxpk= 0, iat= 195, 168, r1= 2.33, r2= 2.63, r3= 2.83, r4= 3.95,
&end
#
# 6  N1R  H3'  6  N1R  H8  3.92  5.08  change
&rst
ixpk= 0, nxpk= 0, iat= 197, 195, r1= 5.42, r2= 5.89, r3= 5.92, r4= 6.08, &end
#
# 6  N1R  H3'  6  N1R  HAA  2.7  3.3  change
&rst
ixpk= 0, nxpk= 0, iat= 197, 168, r1= 2.20, r2= 2.70, r3= 3.60, r4= 3.80,
&end
#
# 6  N1R  H5'  6  N1R  HAA  4.26  5.2
&rst
ixpk= 0, nxpk= 0, iat= 163, 168, r1= 3.76, r2= 4.26, r3= 5.20, r4= 5.70, &end
#
# 6  N1R  H2  6  N1R  HAA  6.18  7.56
&rst
ixpk= 0, nxpk= 0, iat= 179, 168, r1= 5.68, r2= 6.18, r3= 7.56, r4= 8.06,

```

&end

#

# 6 N1R H5' 6 N1R H8 4.91 6.01

&rst

ixpk= 0, nxpk= 0, iat= 163, 195, r1= 4.41, r2= 4.91, r3= 6.01, r4= 6.51,

&end

#

# 6 N1R H8 6 N1R H5'2 4.45 6.45

# &rst

# ixpk= 0, nxpk= 0, iat= 195, 162, r1= 3.95, r2= 4.45, r3= 6.45, r4= 6.95, &end

#

# 6 N1R H4' 6 N1R H8 5.89 7.19

&rst

ixpk= 0, nxpk= 0, iat= 165, 195, r1= 5.39, r2= 5.89, r3= 7.19, r4= 7.69, &end

#

# 6 N1R H5' 6 N1R H2' 3.04 3.72

# &rst

# ixpk= 0, nxpk= 0, iat= 163, 170, r1= 2.54, r2= 3.04, r3= 3.72, r4= 4.22, &end

#

# 7 ADE H8 6 N1R HAA 5.63 6.87

&rst

ixpk= 0, nxpk= 0, iat= 213, 168, r1= 5.13, r2= 5.63, r3= 5.80, r4= 6.07,

&end

#

# 7 ADE H8 6 N1R H3' 5.2 6.8

&rst

ixpk= 0, nxpk= 0, iat= 213, 197, r1= 4.70, r2= 5.20, r3= 6.80, r4= 7.30,

&end

#

# 7 ADE H8 6 NIR H2' 4.45 5.43

&rst

ixpk= 0, nxpk= 0, iat= 213, 170, r1= 3.95, r2= 4.45, r3= 5.43, r4= 5.93, &end

#

# 7 ADE H2 6 NIR H2 4.44 5.62 change

&rst

ixpk= 0, nxpk= 0, iat= 222, 179, r1= 3.94, r2= 4.44, r3= 5.42, r4= 5.92, &end

#

# 7 ADE H4' 6 NIR H8 4.34 5.34

&rst

ixpk= 0, nxpk= 0, iat= 207, 195, r1= 3.84, r2= 4.34, r3= 5.34, r4= 5.84, &end

# 7 ADE H8 7 ADE H1' 4.04 4.94 change

&rst

ixpk= 0, nxpk= 0, iat= 213, 210, r1= 3.54, r2= 3.94, r3= 4.94, r4= 5.44, &end

#

# 7 ADE H5' 7 ADE H8 4.87 6.13

&rst

ixpk= 0, nxpk= 0, iat= 204, 213, r1= 4.37, r2= 4.87, r3= 6.13, r4= 6.63, &end

#

# 7 ADE H4' 7 ADE H8 4.35 5.65

&rst

ixpk= 0, nxpk= 0, iat= 207, 213, r1= 3.85, r2= 4.35, r3= 5.65, r4= 6.15, &end

#

# 7 ADE H4' 7 ADE H1' 2.84 3.56 change

&rst

```

ixpk= 0, nxpk= 0, iat= 207, 210, r1= 2.00, r2= 2.34, r3= 3.56, r4= 4.06, &end
#
# 7  ADE  H2    7    ADE  H1'  4.78  6.22
&rst
ixpk= 0, nxpk= 0, iat= 222, 210, r1= 4.28, r2= 4.78, r3= 6.22, r4= 6.72, &end
#
# 8  GUA  H8    7    ADE  H1'  3.32  4.06  change
&rst
ixpk= 0, nxpk= 0, iat= 245, 210, r1= 2.82, r2= 3.12, r3= 4.06, r4= 4.56, &end
#
# 8  GUA  H8    7    ADE  H8    3.67  4.49  change
&rst
ixpk= 0, nxpk= 0, iat= 245, 213, r1= 3.17, r2= 3.67, r3= 4.70, r4= 4.99, &end
#
# 8  GUA  H1'   7    ADE  H1'  4.96  6.04  change
&rst
ixpk= 0, nxpk= 0, iat= 242, 210, r1= 4.06, r2= 4.46, r3= 6.04, r4= 6.54, &end
#
# 17  THY  H1'   7    ADE  H2    5.19  6.35
# &rst
# ixpk= 0, nxpk= 0, iat= 527, 222, r1= 4.69, r2= 5.19, r3= 6.35, r4= 6.85, &end
#
# 7  ADE  H4'   8    GUA  H1'   3    3.66
# &rst
# ixpk= 0, nxpk= 0, iat= 207, 242, r1= 2.50, r2= 3.00, r3= 3.66, r4= 4.16, &end
#
# 8  GUA  H8    8    GUA  H1'  3.84  4.7

```

&rst

ixpk= 0, nxpk= 0, iat= 245, 242, r1= 3.34, r2= 3.84, r3= 4.70, r4= 5.20, &end

#

# 9 ADE H8 8 GUA H8 4.83 5.91

&rst

ixpk= 0, nxpk= 0, iat= 278, 245, r1= 4.33, r2= 4.83, r3= 5.91, r4= 6.41, &end

#

# 9 ADE H4' 9 ADE H8 4.88 6.12

&rst

ixpk= 0, nxpk= 0, iat= 272, 278, r1= 4.38, r2= 4.88, r3= 6.12, r4= 6.62, &end

#

# 9 ADE H3' 9 ADE H1' 3.58 4.38

&rst

ixpk= 0, nxpk= 0, iat= 291, 275, r1= 3.08, r2= 3.58, r3= 4.38, r4= 4.88, &end

#

# 10 ADE H8 9 ADE H1' 3.68 4.5

&rst

ixpk= 0, nxpk= 0, iat= 310, 275, r1= 3.18, r2= 3.68, r3= 4.50, r4= 5.00, &end

#

# 10 ADE H4' 9 ADE H1' 3 3.6

&rst

ixpk= 0, nxpk= 0, iat= 304, 275, r1= 2.50, r2= 3.00, r3= 3.60, r4= 4.10, &end

#

# 10 ADE H4' 9 ADE H1' 2.74 3.34 change

&rst

ixpk= 0, nxpk= 0, iat= 304, 275, r1= 2.24, r2= 2.74, r3= 3.64, r4= 3.84, &end

#



```

# 10  ADE  H5'  10  ADE  H8  5.34  6.52
&rst
ixpk= 0, nxpk= 0, iat= 301, 310, r1= 4.84, r2= 5.34, r3= 6.52, r4= 7.02, &end
#
# 10  ADE  H8  10  ADE  H4'  4.87  6.13
&rst
ixpk= 0, nxpk= 0, iat= 310, 304, r1= 4.37, r2= 4.87, r3= 6.13, r4= 6.63, &end
#
# 10  ADE  H1'  10  ADE  H4'  2.64  3.22
&rst
ixpk= 0, nxpk= 0, iat= 307, 304, r1= 2.14, r2= 2.64, r3= 3.22, r4= 3.72, &end
#
# 10  ADE  H3'  10  ADE  H1'  3.86  4.72
&rst
ixpk= 0, nxpk= 0, iat= 323, 307, r1= 3.36, r2= 3.86, r3= 4.72, r4= 5.22, &end
#
# 11  GUA  H8  10  ADE  H3'  4.71  5.75  change
&rst
ixpk= 0, nxpk= 0, iat= 342, 323, r1= 4.21, r2= 4.51, r3= 5.75, r4= 6.25, &end
#
# 11  GUA  H8  10  ADE  H8  5.44  6.64
&rst
ixpk= 0, nxpk= 0, iat= 342, 310, r1= 4.94, r2= 5.44, r3= 6.64, r4= 7.14, &end
#
# 11  GUA  H1'  11  GUA  H8  3.45  4.07
&rst
ixpk= 0, nxpk= 0, iat= 339, 342, r1= 2.95, r2= 3.45, r3= 4.07, r4= 4.57, &end

```

```

#
# 11  GUA  H3'  11  GUA  H8  3.26  3.98  change
&rst
ixpk= 0, nxpk= 0, iat= 356, 342, r1= 2.76, r2= 3.10, r3= 3.98, r4= 4.48, &end
#
# 11  GUA  H4'  11  GUA  H3'  2.65  3.23
&rst
ixpk= 0, nxpk= 0, iat= 336, 356, r1= 2.15, r2= 2.65, r3= 3.23, r4= 3.73, &end
#
# 11  GUA  H3'  11  GUA  H2'  2.18  2.66
&rst
ixpk= 0, nxpk= 0, iat= 356, 358, r1= 1.68, r2= 2.18, r3= 2.66, r4= 3.16, &end
#
# 11  GUA  H3'  11  GUA  H2'2  2.62  3.2
&rst
ixpk= 0, nxpk= 0, iat= 356, 359, r1= 2.12, r2= 2.62, r3= 3.20, r4= 3.70, &end
#
# 11  GUA  H1'  11  GUA  H3'  4.28  5.24  change
&rst
ixpk= 0, nxpk= 0, iat= 339, 356, r1= 3.78, r2= 4.00, r3= 5.24, r4= 5.74, &end
#
# 12  CYT  H6  12  CYT  H1'  3.59  4.39
&rst
ixpk= 0, nxpk= 0, iat= 374, 371, r1= 3.09, r2= 3.59, r3= 4.39, r4= 4.89, &end
#
# 12  CYT  H5  12  CYT  H6  2.19  2.61
&rst

```

```

ixpk= 0, nxpk= 0, iat= 376, 374, r1= 1.69, r2= 2.19, r3= 2.61, r4= 3.11, &end
#
# 12  CYT  H4'  12  CYT  H6  4.41  5.39
&rst
ixpk= 0, nxpk= 0, iat= 368, 374, r1= 3.91, r2= 4.41, r3= 5.39, r4= 5.89, &end
#
# 12  CYT  H3'  12  CYT  H1'  4.01  4.89
&rst
ixpk= 0, nxpk= 0, iat= 385, 371, r1= 3.51, r2= 4.01, r3= 4.89, r4= 5.39, &end
#
# 12  CYT  H2'2  12  CYT  H1'  2.04  2.5
&rst
ixpk= 0, nxpk= 0, iat= 388, 371, r1= 1.54, r2= 2.04, r3= 2.50, r4= 3.00, &end
#
# 13  THY  H6  12  CYT  H1'  4.69  5.73
&rst
ixpk= 0, nxpk= 0, iat= 404, 371, r1= 4.19, r2= 4.69, r3= 5.73, r4= 6.23, &end
#
# 13  THY  H6  12  CYT  H3'  4.01  4.91
&rst
ixpk= 0, nxpk= 0, iat= 404, 385, r1= 3.51, r2= 4.01, r3= 4.91, r4= 5.41, &end
#
# 13  THY  H6  12  CYT  H6  3.5  4.5
&rst
ixpk= 0, nxpk= 0, iat= 404, 374, r1= 3.00, r2= 3.50, r3= 4.50, r4= 5.00, &end
#
# 13  THY  M7  12  CYT  H6  4.53  5.53  change

```

&rst

ixpk= 0, nxpk= 0, iat= -1, 374, r1= 4.03, r2= 4.33, r3= 6.64, r4= 7.14,

igr1= 407, 408, 409,

&end

#

# 13    THY   H6     13     THY   H1'    3.35   4.25

&rst

ixpk= 0, nxpk= 0, iat= 404, 401, r1= 2.85, r2= 3.35, r3= 4.25, r4= 4.75, &end

#

# 13    THY   H3'     13     THY   H6     4.09   5.01

&rst

ixpk= 0, nxpk= 0, iat= 417, 404, r1= 3.59, r2= 4.09, r3= 5.01, r4= 5.51, &end

#

# 13    THY   H4'     13     THY   H6     4.23   5.17

&rst

ixpk= 0, nxpk= 0, iat= 398, 404, r1= 3.73, r2= 4.23, r3= 5.17, r4= 5.67, &end

#

# 13    THY   H3'     13     THY   H1'    3.47   4.53

&rst

ixpk= 0, nxpk= 0, iat= 417, 401, r1= 2.97, r2= 3.47, r3= 4.53, r4= 5.03, &end

#

# 13    THY   H3'     13     THY   H2'    4.42   5.4

# &rst

# ixpk= 0, nxpk= 0, iat= 417, 419, r1= 3.92, r2= 4.42, r3= 5.40, r4= 5.90, &end

#

# 14    THY   H6     13     THY   H3'    4.08   4.98

&rst

```

ixpk= 0, nxpk= 0, iat= 436, 417, r1= 3.58, r2= 4.08, r3= 4.98, r4= 5.48, &end
#
# 14  THY  H6   13   THY  H6   4.13  4.87
&rst
ixpk= 0, nxpk= 0, iat= 436, 404, r1= 3.63, r2= 4.13, r3= 4.87, r4= 5.37, &end
#
# 14  THY  M7   13   THY  H1'   3.64  4.46
&rst
ixpk= 0, nxpk= 0, iat= -1, 401, r1= 3.14, r2= 3.64, r3= 5.36, r4= 5.86,
igr1= 439, 440, 441,
&end
#
# 13  THY  H4'  14   THY  H6   5.47  6.69
&rst
ixpk= 0, nxpk= 0, iat= 398, 436, r1= 4.97, r2= 5.47, r3= 6.69, r4= 7.19, &end
#
# 15  CYT  H6   14   THY  H1'   3.82  4.66
&rst
ixpk= 0, nxpk= 0, iat= 468, 433, r1= 3.32, r2= 3.82, r3= 4.66, r4= 5.16, &end
#
# 15  CYT  H6   15   CYT  H1'   3.64  4.44
&rst
ixpk= 0, nxpk= 0, iat= 468, 465, r1= 3.14, r2= 3.64, r3= 4.44, r4= 4.94, &end
#
# 15  CYT  H3'  15   CYT  H1'   3.56  4.36
&rst
ixpk= 0, nxpk= 0, iat= 479, 465, r1= 3.06, r2= 3.56, r3= 4.36, r4= 4.86, &end

```

```

#
# 15  CYT  H2'2  15  CYT  H1'  2.32  2.84 change
&rst
ixpk= 0, nxpk= 0, iat= 482, 465, r1= 1.82, r2= 2.12, r3= 2.84, r4= 3.34, &end
#
# 15  CYT  H2'  15  CYT  H5  4.64  5.68
&rst
ixpk= 0, nxpk= 0, iat= 481, 470, r1= 4.14, r2= 4.64, r3= 5.68, r4= 6.18, &end
#
# 16  THY  H6  15  CYT  H3'  4.45  5.43
&rst
ixpk= 0, nxpk= 0, iat= 498, 479, r1= 3.95, r2= 4.45, r3= 5.43, r4= 5.93, &end
#
# 16  THY  M7  15  CYT  H2'  4.12  4.88
&rst
ixpk= 0, nxpk= 0, iat= -1, 481, r1= 3.62, r2= 4.12, r3= 5.86, r4= 6.36,
igr1= 501, 502, 503,
&end
#
# 16  THY  H6  16  THY  H1'  2.75  3.35 change
&rst
ixpk= 0, nxpk= 0, iat= 498, 495, r1= 2.25, r2= 2.75, r3= 3.85, r4= 4.00, &end
#
# 16  THY  H4'  16  THY  H6  4.82  6.18 change
&rst
ixpk= 0, nxpk= 0, iat= 492, 498, r1= 4.32, r2= 4.42, r3= 6.18, r4= 6.68, &end
#

```

```

# 16  THY  M7   16   THY  H1'   4.79  5.85
&rst
  ixpk= 0, nxpk= 0, iat= -1, 495, r1= 4.29, r2= 4.79, r3= 7.03, r4= 7.53,
  igr1= 501, 502, 503,
&end
#
# 16  THY  H2'   16   THY  M7   3.88  4.74
&rst
  ixpk= 0, nxpk= 0, iat= 513, -1, r1= 3.38, r2= 3.88, r3= 5.69, r4= 6.19,
  igr2= 501, 502, 503,
&end
#
# 17  THY  H6   16   THY  H1'   4.25  5.19
&rst
  ixpk= 0, nxpk= 0, iat= 530, 495, r1= 3.75, r2= 4.25, r3= 5.19, r4= 5.69, &end
#
# 17  THY  H6   16   THY  H3'   3.67  4.49  change
&rst
  ixpk= 0, nxpk= 0, iat= 530, 511, r1= 3.17, r2= 3.67, r3= 4.99, r4= 5.19, &end
#
# 17  THY  H4'   16   THY  H6   4.77  5.83
# &rst
# ixpk= 0, nxpk= 0, iat= 524, 498, r1= 4.27, r2= 4.77, r3= 5.83, r4= 6.33, &end
#
# 17  THY  H4'   16   THY  H1'   2.98  3.64
&rst
  ixpk= 0, nxpk= 0, iat= 524, 495, r1= 2.48, r2= 2.98, r3= 3.64, r4= 4.14, &end

```

```

#
# 17  THY  H6   16   THY  H6   4.38  5.58
&rst
  ixpk= 0, nxpk= 0, iat= 530, 498, r1= 3.88, r2= 4.38, r3= 5.58, r4= 6.08, &end
#
# 17  THY  H6   16   THY  H2'  3.51  4.29 change
&rst
  ixpk= 0, nxpk= 0, iat= 530, 513, r1= 3.01, r2= 3.21, r3= 4.29, r4= 4.79, &end
#
# 17  THY  H4'  16   THY  H2'  3.11  3.81  change
&rst
  ixpk= 0, nxpk= 0, iat= 524, 513, r1= 2.61, r2= 3.11, r3= 4.00, r4= 4.31, &end
#
# 17  THY  M7   16   THY  H1'   4     6
&rst
  ixpk= 0, nxpk= 0, iat= -1, 495, r1= 3.50, r2= 4.00, r3= 7.21, r4= 7.71,
  igr1= 533, 534, 535,
&end
#
# 17  THY  M7   16   THY  H2'  4.73  5.79
&rst
  ixpk= 0, nxpk= 0, iat= -1, 513, r1= 4.23, r2= 4.73, r3= 6.95, r4= 7.45,
  igr1= 533, 534, 535,
&end
#
# 17  THY  M7   16   THY  H2'2  4.34  5.3
&rst

```



```

ixpk= 0, nxpk= 0, iat= -1, 514, r1= 3.84, r2= 4.34, r3= 6.36, r4= 6.86,
igr1= 533, 534, 535,
&end
#
# 17  THY  H6    17  THY  H1'   2.7   3.3   change
&rst
ixpk= 0, nxpk= 0, iat= 530, 527, r1= 2.20, r2= 2.70, r3= 3.50, r4= 3.80, &end
#
# 17  THY  H6    17  THY  H4'   3.72  4.54
&rst
ixpk= 0, nxpk= 0, iat= 530, 524, r1= 3.22, r2= 3.72, r3= 4.54, r4= 5.04, &end
#
# 17  THY  H5'   17  THY  H6    4.89  5.97
# &rst
# ixpk= 0, nxpk= 0, iat= 521, 530, r1= 4.39, r2= 4.89, r3= 5.97, r4= 6.47, &end
#
# 17  THY  H1'   17  THY  H4'   2.93  3.57
&rst
ixpk= 0, nxpk= 0, iat= 527, 524, r1= 2.43, r2= 2.93, r3= 3.57, r4= 4.07, &end
#
# 17  THY  H3'   17  THY  H1'   3.56  4.36
&rst
ixpk= 0, nxpk= 0, iat= 543, 527, r1= 3.06, r2= 3.56, r3= 4.36, r4= 4.86, &end
#
# 18  GUA  H8    17  THY  H1'   5.11  6.25
&rst
ixpk= 0, nxpk= 0, iat= 562, 527, r1= 4.61, r2= 5.11, r3= 6.25, r4= 6.75, &end

```

```

#
# 18  GUA  H8   17   THY  H3'   4.41  5.39
&rst
  ixpk= 0, nxpk= 0, iat= 562, 543, r1= 3.91, r2= 4.41, r3= 5.39, r4= 5.89, &end
#
# 18  GUA  H8   17   THY  H6    5.13  6.27
&rst
  ixpk= 0, nxpk= 0, iat= 562, 530, r1= 4.63, r2= 5.13, r3= 6.27, r4= 6.77, &end
#
# 18  GUA  H8   17   THY  H2'   4.31  5.27 change
&rst
  ixpk= 0, nxpk= 0, iat= 562, 545, r1= 3.81, r2= 4.21, r3= 5.27, r4= 5.77, &end
#
# 18  GUA  H4'  18   GUA  H8    4.83  6.17
&rst
  ixpk= 0, nxpk= 0, iat= 556, 562, r1= 4.33, r2= 4.83, r3= 6.17, r4= 6.67, &end
#
# 18  GUA  H8   18   GUA  H5'2  5.19  6.35
&rst
  ixpk= 0, nxpk= 0, iat= 562, 554, r1= 4.69, r2= 5.19, r3= 6.35, r4= 6.85, &end
#
# 18  GUA  H5'  18   GUA  H8    4.39  5.37
&rst
  ixpk= 0, nxpk= 0, iat= 553, 562, r1= 3.89, r2= 4.39, r3= 5.37, r4= 5.87, &end
#
# 18  GUA  H4'  18   GUA  H1'   3.05  3.73  change
&rst

```

```

ixpk= 0, nxpk= 0, iat= 556, 559, r1= 2.55, r2= 2.80, r3= 3.73, r4= 4.23, &end
#
# 19  THY  H6   18   GUA  H8   3.97  5.03  change
&rst
ixpk= 0, nxpk= 0, iat= 595, 562, r1= 3.47, r2= 3.97, r3= 5.23, r4= 5.53, &end
#
# 19  THY  M7   18   GUA  H8   3.43  4.19
&rst
ixpk= 0, nxpk= 0, iat= -1, 562, r1= 2.93, r2= 3.43, r3= 5.03, r4= 5.53,
igr1= 598, 599, 600,
&end
#
# 19  THY  M7   18   GUA  H1'  3.65  4.47
&rst
ixpk= 0, nxpk= 0, iat= -1, 559, r1= 3.15, r2= 3.65, r3= 5.37, r4= 5.87,
igr1= 598, 599, 600,
&end
#
# 19  THY  H6   19   THY  H1'  3.03  3.71
&rst
ixpk= 0, nxpk= 0, iat= 595, 592, r1= 2.53, r2= 3.03, r3= 3.71, r4= 4.21, &end
#
# 19  THY  H4'  19   THY  H6   4.69  5.73  change
&rst
ixpk= 0, nxpk= 0, iat= 589, 595, r1= 4.19, r2= 4.39, r3= 5.13, r4= 6.23, &end
#
# 19  THY  H4'  19   THY  H1'  2.72  3.28

```

&rst

ixpk= 0, nxpk= 0, iat= 589, 592, r1= 2.22, r2= 2.72, r3= 3.28, r4= 3.78, &end

#

# 19 THY H3' 19 THY H1' 3.38 4.14

&rst

ixpk= 0, nxpk= 0, iat= 608, 592, r1= 2.88, r2= 3.38, r3= 4.14, r4= 4.64, &end

#

# 19 THY M7 19 THY H1' 5.79 7.07

&rst

ixpk= 0, nxpk= 0, iat= -1, 592, r1= 5.29, r2= 5.79, r3= 8.49, r4= 8.99,  
igr1= 598, 599, 600,

&end

#

# 19 THY H2' 19 THY M7 3.75 4.59

&rst

ixpk= 0, nxpk= 0, iat= 610, -1, r1= 3.25, r2= 3.75, r3= 5.51, r4= 6.01,  
igr2= 598, 599, 600,

&end

#

# 19 THY H2'2 19 THY M7 5.11 6.25

&rst

ixpk= 0, nxpk= 0, iat= 611, -1, r1= 4.61, r2= 5.11, r3= 7.51, r4= 8.01,  
igr2= 598, 599, 600,

&end

#

# 20 CYT H6 19 THY H1' 3.68 4.32 change

&rst

```

ixpk= 0, nxpk= 0, iat= 627, 592, r1= 3.18, r2= 3.48, r3= 4.32, r4= 4.82, &end
#
# 20  CYT  H6   19   THY  H3'  4    4.88
&rst
ixpk= 0, nxpk= 0, iat= 627, 608, r1= 3.50, r2= 4.00, r3= 4.88, r4= 5.38, &end
#
# 20  CYT  H6   19   THY  M7   5.67  6.93
&rst
ixpk= 0, nxpk= 0, iat= 627, -1, r1= 5.17, r2= 5.67, r3= 8.32, r4= 8.82,
igr2= 598, 599, 600,
&end
#
# 20  CYT  H5   20   CYT  H6   2.1   2.56
&rst
ixpk= 0, nxpk= 0, iat= 629, 627, r1= 1.60, r2= 2.10, r3= 2.56, r4= 3.06, &end
#
# 20  CYT  H3'  20   CYT  H1'  3.57  4.53
&rst
ixpk= 0, nxpk= 0, iat= 638, 624, r1= 3.07, r2= 3.57, r3= 4.53, r4= 5.03, &end
#
# 21  CYT  H6   20   CYT  H1'  4.13  5.05
&rst
ixpk= 0, nxpk= 0, iat= 657, 624, r1= 3.63, r2= 4.13, r3= 5.05, r4= 5.55, &end
#
# 21  CYT  H5   20   CYT  H5   5.14  6.28
&rst
ixpk= 0, nxpk= 0, iat= 659, 629, r1= 4.64, r2= 5.14, r3= 6.28, r4= 6.78, &end

```

```

#
# 21  CYT  H1'  20  CYT  H1'  5.23  6.39
&rst
  ixpk= 0, nxpk= 0, iat= 654, 624, r1= 4.73, r2= 5.23, r3= 6.39, r4= 6.89, &end
#
# 21  CYT  H6   21  CYT  H1'  3.72  4.54
&rst
  ixpk= 0, nxpk= 0, iat= 657, 654, r1= 3.22, r2= 3.72, r3= 4.54, r4= 5.04, &end
#
# 21  CYT  H3'  21  CYT  H6   2.66  3.26  change
# &rst
# ixpk= 0, nxpk= 0, iat= 668, 657, r1= 2.16, r2= 2.66, r3= 3.56, r4= 3.76, &end
#
# 21  CYT  H5   21  CYT  H1'  4.31  5.69
&rst
  ixpk= 0, nxpk= 0, iat= 659, 654, r1= 3.81, r2= 4.31, r3= 5.69, r4= 6.19, &end
#
# 21  CYT  H2'  21  CYT  H1'  2.51  3.07
&rst
  ixpk= 0, nxpk= 0, iat= 670, 654, r1= 2.01, r2= 2.51, r3= 3.07, r4= 3.57, &end
#
# 21  CYT  H2'  21  CYT  H5   3.34  4.08
# &rst
# ixpk= 0, nxpk= 0, iat= 670, 659, r1= 2.84, r2= 3.34, r3= 4.08, r4= 4.58, &end
#
# 21  CYT  H3'  21  CYT  H5   4.54  5.46  change
&rst

```

```

ixpk= 0, nxpk= 0, iat= 668, 659, r1= 4.04, r2= 4.74, r3= 5.86, r4= 5.96, &end
#
# 22  GUA  H8    21    CYT  H1'   3.61  4.39 change
&rst
ixpk= 0, nxpk= 0, iat= 687, 654, r1= 3.11, r2= 4.31, r3= 4.59, r4= 4.89, &end
#
# 22  GUA  H8    21    CYT  H6    4.05  5.15
&rst
ixpk= 0, nxpk= 0, iat= 687, 657, r1= 3.55, r2= 3.85, r3= 5.15, r4= 5.65, &end
#
# 22  GUA  H3'   21    CYT  H5    4.65  5.35  change
&rst
ixpk= 0, nxpk= 0, iat= 701, 659, r1= 4.15, r2= 4.95, r3= 5.80, r4= 6.00, &end
#
# 22  GUA  H8    21    CYT  H2'   3.52  4.3   change
&rst
ixpk= 0, nxpk= 0, iat= 687, 670, r1= 3.02, r2= 3.32, r3= 4.30, r4= 4.80, &end
#
# 22  GUA  H8    22    GUA  H1'   3.1   3.78
&rst
ixpk= 0, nxpk= 0, iat= 687, 684, r1= 2.60, r2= 3.10, r3= 3.78, r4= 4.28, &end
#
# 22  GUA  H3'   22    GUA  H8    2.11  2.89
&rst
ixpk= 0, nxpk= 0, iat= 701, 687, r1= 1.61, r2= 2.11, r3= 2.89, r4= 3.39, &end
#
# 22  GUA  H4'   22    GUA  H8    4.35  5.65

```

&rst

ixpk= 0, nxpk= 0, iat= 681, 687, r1= 3.85, r2= 4.35, r3= 5.65, r4= 6.15, &end

#

# 22 GUA H3' 22 GUA H1' 3.42 4.18

&rst

ixpk= 0, nxpk= 0, iat= 701, 684, r1= 2.92, r2= 3.42, r3= 4.18, r4= 4.68, &end

#

# 22 GUA H4' 22 GUA H3' 2.4 2.94 change

&rst

ixpk= 0, nxpk= 0, iat= 681, 701, r1= 1.90, r2= 2.70, r3= 3.14, r4= 3.44, &end

#

# 1 CYT H2' 1 CYT H6 2.19 2.67

&rst

ixpk= 0, nxpk= 0, iat= 26, 13, r1= 1.69, r2= 2.19, r3= 2.67, r4= 3.17,

&end

#

# 3 GUA H1' 3 GUA H2'' 2.14 2.62

&rst

ixpk= 0, nxpk= 0, iat= 73, 93, r1= 1.64, r2= 2.14, r3= 2.62, r4= 3.12, &end

#

# 5 CYT H2'' 5 CYT H6 2.42 2.96 change

&rst

ixpk= 0, nxpk= 0, iat= 155, 141, r1= 1.92, r2= 2.72, r3= 3.20, r4= 3.46, &end

#

# 5 CYT H2' 5 CYT H1' 2.51 3.07

&rst

ixpk= 0, nxpk= 0, iat= 154, 138, r1= 2.01, r2= 2.51, r3= 3.07, r4= 3.57, &end



```

#
# 6  N1R  H2'  6  N1R  H8  2.1  2.56
&rst
ixpk= 0, nxpk= 0, iat= 170, 195, r1= 1.60, r2= 2.10, r3= 2.56, r4= 3.06, &end
#
# 7  ADE  H1'  6  N1R  H2''  4.09  4.99
&rst
ixpk= 0, nxpk= 0, iat= 210, 171, r1= 3.59, r2= 4.09, r3= 4.99, r4= 5.49, &end
#
# 8  GUA  H8  7  ADE  H2  5.73  7.01
&rst
ixpk= 0, nxpk= 0, iat= 245, 222, r1= 5.23, r2= 5.73, r3= 7.01, r4= 7.51, &end
#
# 9  ADE  H8  9  ADE  H1'  3.26  3.94
&rst
ixpk= 0, nxpk= 0, iat= 278, 275, r1= 2.76, r2= 3.26, r3= 3.94, r4= 4.44, &end
#
# 10 ADE  H8  10 ADE  H1'  3.49  4.27
&rst
ixpk= 0, nxpk= 0, iat= 310, 307, r1= 2.99, r2= 3.49, r3= 4.27, r4= 4.77, &end
#
# 10 ADE  H2''  10 ADE  H1'  2.08  2.54
&rst
ixpk= 0, nxpk= 0, iat= 326, 307, r1= 1.58, r2= 2.08, r3= 2.54, r4= 3.04, &end
#
# 11 GUA  H5''  11 GUA  H3'  2.51  3.07
&rst

```

```

ixpk= 0, nxpk= 0, iat= 334, 356, r1= 2.01, r2= 2.51, r3= 3.07, r4= 3.57, &end
#
# 11  GUA  H5'  11  GUA  H3'  3.21  3.79
&rst
ixpk= 0, nxpk= 0, iat= 333, 356, r1= 2.71, r2= 3.21, r3= 3.79, r4= 4.29, &end
#
# 12  CYT  H4'  12  CYT  H1'  2.93  3.47
&rst
ixpk= 0, nxpk= 0, iat= 368, 371, r1= 2.43, r2= 2.93, r3= 3.47, r4= 3.97, &end
#
# 12  CYT  H2'  12  CYT  H1'  2.21  2.71
# &rst
# ixpk= 0, nxpk= 0, iat= 387, 371, r1= 1.71, r2= 2.21, r3= 2.71, r4= 3.21, &end
#
# 15  CYT  H5  14  THY  H2'  3.56  4.36
&rst
ixpk= 0, nxpk= 0, iat= 470, 451, r1= 3.06, r2= 3.56, r3= 4.36, r4= 4.86, &end
#
# 15  CYT  H3'  15  CYT  H6  2.93  3.59
&rst
ixpk= 0, nxpk= 0, iat= 479, 468, r1= 2.43, r2= 2.93, r3= 3.59, r4= 4.09, &end
#
# 16  THY  H6  15  CYT  H2'  3  3.8
&rst
ixpk= 0, nxpk= 0, iat= 498, 481, r1= 2.50, r2= 3.00, r3= 3.80, r4= 4.30, &end
#
# 16  THY  M7  15  CYT  H6  4.39  5.21

```

&rst

ixpk= 0, nxpk= 0, iat= -1, 468, r1= 3.89, r2= 4.39, r3= 6.26, r4= 6.76,

igr1= 501, 502, 503,

&end

#

# 16 THY M7 15 CYT H2" 4.32 5.28

&rst

ixpk= 0, nxpk= 0, iat= -1, 482, r1= 3.82, r2= 4.32, r3= 6.34, r4= 6.84,

igr1= 501, 502, 503,

&end

#

# 16 THY H4' 16 THY H1' 3.27 4.13

&rst

ixpk= 0, nxpk= 0, iat= 492, 495, r1= 2.77, r2= 3.27, r3= 4.13, r4= 4.63, &end

#

# 16 THY M7 16 THY H6 2.25 2.75

&rst

ixpk= 0, nxpk= 0, iat= -1, 498, r1= 1.75, r2= 2.25, r3= 3.30, r4= 3.80,

igr1= 501, 502, 503,

&end

#

# 16 THY H2" 16 THY M7 2.9 5.3

&rst

ixpk= 0, nxpk= 0, iat= 514, -1, r1= 2.40, r2= 2.90, r3= 6.36, r4= 6.86,

igr2= 501, 502, 503,

&end

#

```

# 17  THY  H4'  16  THY  H1'  2.98  3.64
&rst
  ixpk= 0, nxpk= 0, iat= 524, 495, r1= 2.48, r2= 2.98, r3= 3.64, r4= 4.14, &end
#
# 17  THY  M7   16  THY  H6   4.12  5.04
&rst
  ixpk= 0, nxpk= 0, iat= -1, 498, r1= 3.62, r2= 4.12, r3= 6.05, r4= 6.55,
  igr1= 533, 534, 535,
&end
#
# 17  THY  H3'  17  THY  H6   2.84  3.48  change
&rst
  ixpk= 0, nxpk= 0, iat= 543, 530, r1= 2.34, r2= 2.94, r3= 3.78, r4= 3.98, &end
#
# 17  THY  M7   17  THY  H6   3     3.66
&rst
  ixpk= 0, nxpk= 0, iat= -1, 530, r1= 2.50, r2= 3.00, r3= 4.40, r4= 4.90,
  igr1= 533, 534, 535,
&end
#
# 17  THY  H2"  17  THY  H2'  2.15  2.63
# &rst
# ixpk= 0, nxpk= 0, iat= 546, 545, r1= 1.65, r2= 2.15, r3= 2.63, r4= 3.13, &end
#
# 17  THY  H2"  17  THY  M7   5.22  6.38
&rst
  ixpk= 0, nxpk= 0, iat= 546, -1, r1= 4.72, r2= 5.22, r3= 7.66, r4= 8.16,

```

igr2= 533, 534, 535,

&end

#

# 17 THY H2' 17 THY M7 2.02 4.42

&rst

ixpk= 0, nxpk= 0, iat= 545, -1, r1= 1.52, r2= 2.02, r3= 5.31, r4= 5.81,

igr2= 533, 534, 535,

&end

#

# 18 GUA H8 18 GUA H1' 3.67 4.49

&rst

ixpk= 0, nxpk= 0, iat= 562, 559, r1= 3.17, r2= 3.67, r3= 4.49, r4= 4.99, &end

#

# 19 THY H6 18 GUA H1' 3.25 3.95

&rst

ixpk= 0, nxpk= 0, iat= 595, 559, r1= 2.75, r2= 3.25, r3= 3.95, r4= 4.45, &end

#

# 19 THY H3' 19 THY H6 2.93 3.57 change

&rst

ixpk= 0, nxpk= 0, iat= 608, 595, r1= 2.43, r2= 3.13, r3= 3.97, r4= 4.17, &end

#

# 19 THY H5" 19 THY H6 4.78 5.84

&rst

ixpk= 0, nxpk= 0, iat= 587, 595, r1= 4.28, r2= 4.78, r3= 5.84, r4= 6.34, &end

#

# 19 THY H6 19 THY H5' 3.58 4.62

&rst

```

ixpk= 0, nxpk= 0, iat= 595, 586, r1= 3.08, r2= 3.58, r3= 4.62, r4= 5.12, &end
#
# 19  THY  H1'  19  THY  H5'  3.72  4.28  change
&rst
ixpk= 0, nxpk= 0, iat= 592, 586, r1= 3.22, r2= 3.72, r3= 4.48, r4= 4.78, &end
#
# 19  THY  H2'  19  THY  H6  3.19  3.89
# &rst
# ixpk= 0, nxpk= 0, iat= 610, 595, r1= 2.69, r2= 3.19, r3= 3.89, r4= 4.39, &end
#
# 19  THY  H2'' 19  THY  H1'  2.14  2.62
&rst
ixpk= 0, nxpk= 0, iat= 611, 592, r1= 1.64, r2= 2.14, r3= 2.62, r4= 3.12, &end
#
# 19  THY  M7  19  THY  H6  2.66  3.26
&rst
ixpk= 0, nxpk= 0, iat= -1, 595, r1= 2.16, r2= 2.66, r3= 3.92, r4= 4.42,
igr1= 598, 599, 600,
&end
#
# 19  THY  H4'  19  THY  H2'  3.72  4.68
&rst
ixpk= 0, nxpk= 0, iat= 589, 610, r1= 3.22, r2= 3.72, r3= 4.68, r4= 5.18, &end
#
# 20  CYT  H6  19  THY  H6  3.57  4.43 change
&rst
ixpk= 0, nxpk= 0, iat= 627, 595, r1= 3.07, r2= 3.77, r3= 4.63, r4= 4.93, &end

```

```

#
# 20  CYT  H6   20  CYT  H1'   3.22  3.78
&rst
  ixpk= 0, nxpk= 0, iat= 627, 624, r1= 2.72, r2= 3.22, r3= 3.78, r4= 4.28, &end
#
# 21  CYT  H5   20  CYT  H1'   4.6    5.4   change
&rst
  ixpk= 0, nxpk= 0, iat= 659, 624, r1= 4.10, r2= 4.80, r3= 5.60, r4= 5.90, &end
#
# 21  CYT  H5   20  CYT  H2'   3.1    3.9
&rst
  ixpk= 0, nxpk= 0, iat= 659, 640, r1= 2.60, r2= 3.10, r3= 3.90, r4= 4.40, &end
#
# 21  CYT  H5   20  CYT  H2"   2.99   3.65
&rst
  ixpk= 0, nxpk= 0, iat= 659, 641, r1= 2.49, r2= 2.99, r3= 3.65, r4= 4.15, &end
#
# 21  CYT  H5   21  CYT  H6    2.22   2.72
&rst
  ixpk= 0, nxpk= 0, iat= 659, 657, r1= 1.72, r2= 2.22, r3= 2.72, r4= 3.22, &end
#
# 21  CYT  H6   21  CYT  H5"   5      6.12  change
&rst
  ixpk= 0, nxpk= 0, iat= 657, 649, r1= 4.50, r2= 4.80, r3= 5.72, r4= 6.62, &end
#
# 21  CYT  H2"  21  CYT  H1'   2.24   2.76
&rst

```

```

ixpk= 0, nxpk= 0, iat= 671, 654, r1= 1.74, r2= 2.24, r3= 2.76, r4= 3.26, &end
#
# 21  CYT  H3'  21  CYT  H2"  2.63  3.21
&rst
ixpk= 0, nxpk= 0, iat= 668, 671, r1= 2.13, r2= 2.63, r3= 3.21, r4= 3.71, &end
#
# 22  GUA  H8   21  CYT  H3'  5.3   6.48
&rst
ixpk= 0, nxpk= 0, iat= 687, 668, r1= 4.80, r2= 5.30, r3= 6.48, r4= 6.98, &end
#
# 22  GUA  H5'  22  GUA  H8   4.16  5.08  change
&rst
ixpk= 0, nxpk= 0, iat= 678, 687, r1= 3.66, r2= 4.56, r3= 5.28, r4= 5.58, &end
#
# 1   CYT  H1'  1   CYT  H2'  2.86  3.5
&rst
ixpk= 0, nxpk= 0, iat= 10, 26, r1= 2.36, r2= 2.86, r3= 3.50, r4= 4.00,
&end
#
# 2   GUA  H2'  2   GUA  H8   2.31  2.83
&rst
ixpk= 0, nxpk= 0, iat= 59, 43, r1= 1.81, r2= 2.31, r3= 2.83, r4= 3.33, &end
#
# 2   GUA  H1'  2   GUA  H5'  4.41  5.59
&rst
ixpk= 0, nxpk= 0, iat= 40, 34, r1= 3.91, r2= 4.41, r3= 5.59, r4= 6.09, &end
#

```



```

# 4  ADE  H8  3  GUA  H3'  4.44  5.56
&rst
ixpk= 0, nxpk= 0, iat= 109, 90, r1= 3.94, r2= 4.44, r3= 5.56, r4= 6.06, &end
#
# 4  ADE  H3'  4  ADE  H8  3.9  4.5
&rst
ixpk= 0, nxpk= 0, iat= 122, 109, r1= 3.40, r2= 3.90, r3= 4.50, r4= 5.00, &end
#
# 5  CYT  H5  4  ADE  H8  3.11  3.81
&rst
ixpk= 0, nxpk= 0, iat= 143, 109, r1= 2.61, r2= 3.11, r3= 3.81, r4= 4.31, &end
#
# 5  CYT  H2'  5  CYT  H6  1.93  2.47
&rst
ixpk= 0, nxpk= 0, iat= 154, 141, r1= 1.43, r2= 1.93, r3= 2.47, r4= 2.97, &end
#
# 5  CYT  H3'  5  CYT  H2'  2.14  2.66
&rst
ixpk= 0, nxpk= 0, iat= 152, 154, r1= 1.64, r2= 2.14, r3= 2.66, r4= 3.16, &end
#
# 5  CYT  H2''  5  CYT  H2'  1.76  2.24
&rst
ixpk= 0, nxpk= 0, iat= 155, 154, r1= 1.26, r2= 1.76, r3= 2.24, r4= 2.74, &end
#
# 6  N1R  H2'  6  N1R  HAA  2.11  2.57
# &rst
# ixpk= 0, nxpk= 0, iat= 170, 168, r1= 1.61, r2= 2.11, r3= 2.57, r4= 3.07, &end

```

```

#
# 9  ADE  H3'  9  ADE  H8  3.52  4.3
&rst
ixpk= 0, nxpk= 0, iat= 291, 278, r1= 3.02, r2= 3.52, r3= 4.30, r4= 4.80, &end
#
# 9  ADE  H5'  9  ADE  H8  4.01  4.91
&rst
ixpk= 0, nxpk= 0, iat= 269, 278, r1= 3.51, r2= 4.01, r3= 4.91, r4= 5.41, &end
#
# 9  ADE  H2'' 9  ADE  H1'  2.1  2.56
&rst
ixpk= 0, nxpk= 0, iat= 294, 275, r1= 1.60, r2= 2.10, r3= 2.56, r4= 3.06, &end
#
# 9  ADE  H2'' 9  ADE  H1'  2.1  2.56
&rst
ixpk= 0, nxpk= 0, iat= 294, 275, r1= 1.60, r2= 2.10, r3= 2.56, r4= 3.06, &end
#
# 10 ADE  H8  9  ADE  H3'  4.23  5.17
&rst
ixpk= 0, nxpk= 0, iat= 310, 291, r1= 3.73, r2= 4.23, r3= 5.17, r4= 5.67, &end
#
# 10 ADE  H8  9  ADE  H2'' 2.06  2.54
&rst
ixpk= 0, nxpk= 0, iat= 310, 294, r1= 1.56, r2= 2.06, r3= 2.54, r4= 3.04, &end
#
# 10 ADE  H3' 10  ADE  H8  3.65  4.47
&rst

```

```

ixpk= 0, nxpk= 0, iat= 323, 310, r1= 3.15, r2= 3.65, r3= 4.47, r4= 4.97, &end
#
# 10  ADE  H2'  10  ADE  H8  2.26  2.76
&rst
ixpk= 0, nxpk= 0, iat= 325, 310, r1= 1.76, r2= 2.26, r3= 2.76, r4= 3.26, &end
#
# 11  GUA  H1'  11  GUA  H2'  2.58  3.16
&rst
ixpk= 0, nxpk= 0, iat= 339, 358, r1= 2.08, r2= 2.58, r3= 3.16, r4= 3.66, &end
#
# 12  CYT  H5"  12  CYT  H6  3.76  4.6
&rst
ixpk= 0, nxpk= 0, iat= 366, 374, r1= 3.26, r2= 3.76, r3= 4.60, r4= 5.10, &end
#
# 12  CYT  H5'  12  CYT  H6  4.21  5.15
&rst
ixpk= 0, nxpk= 0, iat= 365, 374, r1= 3.71, r2= 4.21, r3= 5.15, r4= 5.65, &end
#
# 12  CYT  H5'  12  CYT  H3'  2.9  3.5  change
&rst
ixpk= 0, nxpk= 0, iat= 365, 385, r1= 2.40, r2= 3.20, r3= 3.80, r4= 4.00, &end
#
# 12  CYT  H5"  12  CYT  H3'  2.65  3.25
&rst
ixpk= 0, nxpk= 0, iat= 366, 385, r1= 2.15, r2= 2.65, r3= 3.25, r4= 3.75, &end
#
# 12  CYT  H2"  12  CYT  H6  3.15  3.85

```

&rst

ixpk= 0, nxpk= 0, iat= 388, 374, r1= 2.65, r2= 3.15, r3= 3.85, r4= 4.35, &end

#

# 12 CYT H2" 12 CYT H6 3.44 4.2

&rst

ixpk= 0, nxpk= 0, iat= 388, 374, r1= 2.94, r2= 3.44, r3= 4.20, r4= 4.70, &end

#

# 12 CYT H3' 12 CYT H2" 3.01 3.67

&rst

ixpk= 0, nxpk= 0, iat= 385, 388, r1= 2.51, r2= 3.01, r3= 3.67, r4= 4.17, &end

#

# 13 THY H6 12 CYT H2' 2.91 3.55

&rst

ixpk= 0, nxpk= 0, iat= 404, 387, r1= 2.41, r2= 2.91, r3= 3.55, r4= 4.05, &end

#

# 13 THY M7 13 THY H6 0.86 3.26

&rst

ixpk= 0, nxpk= 0, iat= -1, 404, r1= 0.36, r2= 0.86, r3= 3.92, r4= 4.42,

igr1= 407, 408, 409,

&end

#

# 14 THY H6 13 THY H1' 3.44 4.2

&rst

ixpk= 0, nxpk= 0, iat= 436, 401, r1= 2.94, r2= 3.44, r3= 4.20, r4= 4.70, &end

#

# 14 THY H6 13 THY H2' 3.15 3.85

&rst

```

ixpk= 0, nxpk= 0, iat= 436, 419, r1= 2.65, r2= 3.15, r3= 3.85, r4= 4.35, &end
#
# 14  THY  H6   14  THY  H1'  3.55  4.35
&rst
ixpk= 0, nxpk= 0, iat= 436, 433, r1= 3.05, r2= 3.55, r3= 4.35, r4= 4.85, &end
#
# 14  THY  H6   14  THY  H4'  4.5   5.5
&rst
ixpk= 0, nxpk= 0, iat= 436, 430, r1= 4.00, r2= 4.50, r3= 5.50, r4= 6.00, &end
#
# 14  THY  H5"  14  THY  H6   4.9   6.1   change
&rst
ixpk= 0, nxpk= 0, iat= 428, 436, r1= 4.40, r2= 4.90, r3= 5.50, r4= 6.60, &end
#
# 14  THY  H5'  14  THY  H6   3.96  5.04
&rst
ixpk= 0, nxpk= 0, iat= 427, 436, r1= 3.46, r2= 3.96, r3= 5.04, r4= 5.54, &end
#
# 14  THY  H2'  14  THY  H6   2.42  2.96
&rst
ixpk= 0, nxpk= 0, iat= 451, 436, r1= 1.92, r2= 2.42, r3= 2.96, r4= 3.46, &end
#
# 14  THY  M7   14  THY  H6   2.17  2.65
&rst
ixpk= 0, nxpk= 0, iat= -1, 436, r1= 1.67, r2= 2.17, r3= 3.18, r4= 3.68,
igr1= 439, 440, 441,
&end

```

```

#
# 15  CYT  H5   14   THY  H1'  4.82  5.88
&rst
  ixpk= 0, nxpk= 0, iat= 470, 433, r1= 4.32, r2= 4.82, r3= 5.88, r4= 6.38, &end
#
# 15  CYT  H6   14   THY  H2"  3      3.66  change
&rst
  ixpk= 0, nxpk= 0, iat= 468, 452, r1= 2.50, r2= 2.80, r3= 3.46, r4= 4.16, &end
#
# 15  CYT  H4'  15   CYT  H6   4.77  5.83
&rst
  ixpk= 0, nxpk= 0, iat= 462, 468, r1= 4.27, r2= 4.77, r3= 5.83, r4= 6.33, &end
#
# 15  CYT  H5'  15   CYT  H6   4.11  5.03
&rst
  ixpk= 0, nxpk= 0, iat= 459, 468, r1= 3.61, r2= 4.11, r3= 5.03, r4= 5.53, &end
#
# 15  CYT  H5"  15   CYT  H6   4.51  5.51
&rst
  ixpk= 0, nxpk= 0, iat= 460, 468, r1= 4.01, r2= 4.51, r3= 5.51, r4= 6.01, &end
#
# 15  CYT  H2'  15   CYT  H1'  2.33  2.85
&rst
  ixpk= 0, nxpk= 0, iat= 481, 465, r1= 1.83, r2= 2.33, r3= 2.85, r4= 3.35, &end
#
# 16  THY  H5'  15   CYT  H1'  2.5   3.1   change
&rst

```

```

ixpk= 0, nxpk= 0, iat= 489, 465, r1= 2.00, r2= 2.70, r3= 3.30, r4= 3.60, &end
#
# 16  THY  H6   15   CYT  H6   4.41  5.19  change
&rst
ixpk= 0, nxpk= 0, iat= 498, 468, r1= 3.91, r2= 4.61, r3= 5.39, r4= 5.69, &end
#
# 16  THY  H3'  16   THY  H6   2.76  3.38  change
&rst
ixpk= 0, nxpk= 0, iat= 511, 498, r1= 2.26, r2= 2.46, r3= 3.18, r4= 3.88, &end
#
# 16  THY  H6   16   THY  H5'  4.27  5.21
&rst
ixpk= 0, nxpk= 0, iat= 498, 489, r1= 3.77, r2= 4.27, r3= 5.21, r4= 5.71, &end
#
# 16  THY  H3'  16   THY  H1'  3.8   4.64
&rst
ixpk= 0, nxpk= 0, iat= 511, 495, r1= 3.30, r2= 3.80, r3= 4.64, r4= 5.14, &end
#
# 16  THY  H2"  16   THY  H6   3.12  3.88
&rst
ixpk= 0, nxpk= 0, iat= 514, 498, r1= 2.62, r2= 3.12, r3= 3.88, r4= 4.38, &end
#
# 16  THY  H3'  16   THY  H2"  2.4   3
&rst
ixpk= 0, nxpk= 0, iat= 511, 514, r1= 1.90, r2= 2.40, r3= 3.00, r4= 3.50, &end
#
# 16  THY  H2"  16   THY  H1'  2.46  3

```

&rst

ixpk= 0, nxpk= 0, iat= 514, 495, r1= 1.96, r2= 2.16, r3= 2.80, r4= 3.50, &end

#

# 17 THY H2" 17 THY H6 2.94 3.6

# &rst

# ixpk= 0, nxpk= 0, iat= 546, 530, r1= 2.44, r2= 2.94, r3= 3.60, r4= 4.10, &end

#

# 17 THY H2' 17 THY H6 2.66 3.26 change

&rst

ixpk= 0, nxpk= 0, iat= 545, 530, r1= 2.16, r2= 2.56, r3= 3.26, r4= 3.76, &end

#

# 17 THY H3' 17 THY H2" 2.9 3.54 change

&rst

ixpk= 0, nxpk= 0, iat= 543, 546, r1= 2.40, r2= 2.70, r3= 3.24, r4= 4.04, &end

#

# 17 THY H2" 17 THY H1' 2.46 3

&rst

ixpk= 0, nxpk= 0, iat= 546, 527, r1= 1.96, r2= 2.46, r3= 3.00, r4= 3.50, &end

#

# 19 THY H6 18 GUA H2' 3.13 3.87

# &rst

# ixpk= 0, nxpk= 0, iat= 595, 578, r1= 2.63, r2= 3.13, r3= 3.87, r4= 4.37, &end

#

# 19 THY H6 18 GUA H2' 3.15 3.85 change

# &rst

# ixpk= 0, nxpk= 0, iat= 595, 578, r1= 2.65, r2= 3.15, r3= 4.15, r4= 4.35, &end

#



```

# 19  THY  M7  18  GUA  H2'  3.15  3.85
&rst
  ixpk= 0, nxpk= 0, iat= -1, 578, r1= 2.65, r2= 3.15, r3= 4.62, r4= 5.12,
  igr1= 598, 599, 600,
&end
#
# 19  THY  M7  18  GUA  H2"  3.09  3.77  change
&rst
  ixpk= 0, nxpk= 0, iat= -1, 579, r1= 2.59, r2= 2.79, r3= 3.53, r4= 5.03,
  igr1= 598, 599, 600,
&end
#
# 19  THY  H2'  19  THY  H1'  2.53  3.09
&rst
  ixpk= 0, nxpk= 0, iat= 610, 592, r1= 2.03, r2= 2.53, r3= 3.09, r4= 3.59, &end
#
# 19  THY  H3'  19  THY  H2'  2.03  2.57
&rst
  ixpk= 0, nxpk= 0, iat= 608, 610, r1= 1.53, r2= 2.03, r3= 2.57, r4= 3.07, &end
#
# 20  CYT  H3'  20  CYT  H6  3.27  3.93
&rst
  ixpk= 0, nxpk= 0, iat= 638, 627, r1= 2.77, r2= 3.27, r3= 3.93, r4= 4.43, &end
#
# 21  CYT  H2'  21  CYT  H6  2.22  2.78  change
&rst
  ixpk= 0, nxpk= 0, iat= 670, 657, r1= 1.72, r2= 2.02, r3= 2.78, r4= 3.28, &end

```

```

#
# 21  CYT  H3'  21  CYT  H2'  2.22  2.78  change
&rst
ixpk= 0, nxpk= 0, iat= 668, 670, r1= 1.72, r2= 2.02, r3= 2.78, r4= 3.28, &end
#
# 21  CYT  H4'  21  CYT  H2'  4.01  4.99  change
&rst
ixpk= 0, nxpk= 0, iat= 651, 670, r1= 3.51, r2= 3.81, r3= 4.69, r4= 5.49, &end
#
# 22  GUA  H5"  22  GUA  H8    5.4   6.6
&rst
ixpk= 0, nxpk= 0, iat= 679, 687, r1= 4.90, r2= 5.40, r3= 6.60, r4= 7.10, &end
#
# 22  GUA  H5'  22  GUA  H1'  3.92  4.48
&rst
ixpk= 0, nxpk= 0, iat= 678, 684, r1= 3.42, r2= 3.92, r3= 4.48, r4= 4.98, &end
#
# 22  GUA  H3'  22  GUA  H2'  2.35  2.87
&rst
ixpk= 0, nxpk= 0, iat= 701, 703, r1= 1.85, r2= 2.35, r3= 2.87, r4= 3.37, &end
#
# 22  GUA  H2"  22  GUA  H8    3.04  3.72
&rst
ixpk= 0, nxpk= 0, iat= 704, 687, r1= 2.54, r2= 3.04, r3= 3.72, r4= 4.22, &end
#
# 1   CYT  H5   1   CYT  H6   2.14  2.62
&rst

```

```

ixpk= 0, nxpk= 0, iat= 15, 13, r1= 1.64, r2= 2.14, r3= 2.62, r4= 3.12,
&end
#
# 1  CYT  H2'  1  CYT  H6  2.29  2.79
&rst
ixpk= 0, nxpk= 0, iat= 26, 13, r1= 1.79, r2= 2.29, r3= 2.79, r4= 3.29, &end
#
# 2  GUA  H3'  2  GUA  H2'  2.29  2.79
&rst
ixpk= 0, nxpk= 0, iat= 57, 59, r1= 1.79, r2= 2.29, r3= 2.79, r4= 3.29, &end
#
# 5  CYT  H2'' 5  CYT  H1'  2.26  2.76
&rst
ixpk= 0, nxpk= 0, iat= 155, 138, r1= 1.76, r2= 2.26, r3= 2.76, r4= 3.26, &end
#
# 5  CYT  H3'  5  CYT  H2'' 2.38  2.92
&rst
ixpk= 0, nxpk= 0, iat= 152, 155, r1= 1.88, r2= 2.38, r3= 2.92, r4= 3.42, &end
#
# 6  NIR  H2'' 6  NIR  H8  2.92  3.56
&rst
ixpk= 0, nxpk= 0, iat= 171, 195, r1= 2.42, r2= 2.92, r3= 3.56, r4= 4.06, &end
#
# 8  GUA  H2'  8  GUA  H1'  2.66  3.26
&rst
ixpk= 0, nxpk= 0, iat= 261, 242, r1= 2.16, r2= 2.66, r3= 3.26, r4= 3.76, &end
#

```

```

# 8   GUA  H2"   8   GUA  H1'   2.19  2.67
&rst
ixpk= 0, nxpk= 0, iat= 262, 242, r1= 1.69, r2= 2.19, r3= 2.67, r4= 3.17, &end
#
# 9   ADE  H8    8   GUA  H1'   3.46  4.22
&rst
ixpk= 0, nxpk= 0, iat= 278, 242, r1= 2.96, r2= 3.46, r3= 4.22, r4= 4.72, &end
#
# 9   ADE  H4'   9   ADE  H3'   2.21  2.69
&rst
ixpk= 0, nxpk= 0, iat= 272, 291, r1= 1.71, r2= 2.21, r3= 2.69, r4= 3.19, &end
#
# 9   ADE  H2'   9   ADE  H1'   3.1   3.8
&rst
ixpk= 0, nxpk= 0, iat= 293, 275, r1= 2.60, r2= 3.10, r3= 3.80, r4= 4.30, &end
#
# 10  ADE  H2"  10   ADE  H8    3.64  4.36  change
&rst
ixpk= 0, nxpk= 0, iat= 326, 310, r1= 3.14, r2= 3.44, r3= 4.16, r4= 4.86, &end
#
# 12  CYT  H3'  12   CYT  H6    2.51  3.07
# &rst
# ixpk= 0, nxpk= 0, iat= 385, 374, r1= 2.01, r2= 2.51, r3= 3.07, r4= 3.57, &end
#
# 12  CYT  H3'  12   CYT  H2'   2.21  2.79
&rst
ixpk= 0, nxpk= 0, iat= 385, 387, r1= 1.71, r2= 2.21, r3= 2.79, r4= 3.29, &end

```

```

#
# 13  THY  H6   12   CYT  H2'   2.81  3.43
&rst
  ixpk= 0, nxpk= 0, iat= 404, 387, r1= 2.31, r2= 2.81, r3= 3.43, r4= 3.93, &end
#
# 13  THY  H5"  13   THY  H6   4.99  6.11  change
&rst
  ixpk= 0, nxpk= 0, iat= 396, 404, r1= 4.49, r2= 4.79, r3= 5.51, r4= 6.61, &end
#
# 13  THY  H5'  13   THY  H6   4.21  5.15
&rst
  ixpk= 0, nxpk= 0, iat= 395, 404, r1= 3.71, r2= 4.21, r3= 5.15, r4= 5.65, &end
#
# 13  THY  H4'  13   THY  H1'   2.68  3.28
&rst
  ixpk= 0, nxpk= 0, iat= 398, 401, r1= 2.18, r2= 2.68, r3= 3.28, r4= 3.78, &end
#
# 13  THY  H2"  13   THY  H6   2.72  3.28  change
&rst
  ixpk= 0, nxpk= 0, iat= 420, 404, r1= 2.22, r2= 2.92, r3= 3.58, r4= 3.78, &end
#
# 13  THY  H2'  13   THY  H1'   4.22  5.18
# &rst
# ixpk= 0, nxpk= 0, iat= 419, 401, r1= 3.72, r2= 4.22, r3= 5.18, r4= 5.68, &end
#
# 15  CYT  H6   14   THY  H2'   2.68  3.28  change
&rst

```

```

ixpk= 0, nxpk= 0, iat= 468, 451, r1= 2.18, r2= 2.78, r3= 3.38, r4= 3.78, &end
#
# 15  CYT  H5    15  CYT  H6    2.32  2.84
&rst
ixpk= 0, nxpk= 0, iat= 470, 468, r1= 1.82, r2= 2.32, r3= 2.84, r4= 3.34, &end
#
# 15  CYT  H4'   15  CYT  H1'   2.85  3.49  change
&rst
ixpk= 0, nxpk= 0, iat= 462, 465, r1= 2.35, r2= 2.65, r3= 3.29, r4= 3.99, &end
#
# 15  CYT  H4'   15  CYT  H3'   2.74  3.34
&rst
ixpk= 0, nxpk= 0, iat= 462, 479, r1= 2.24, r2= 2.74, r3= 3.34, r4= 3.84, &end
#
# 15  CYT  H2'   15  CYT  H6    2.22  2.78
# &rst
# ixpk= 0, nxpk= 0, iat= 481, 468, r1= 1.72, r2= 2.22, r3= 2.78, r4= 3.28, &end
#
# 15  CYT  H3'   15  CYT  H2''  2.47  3.03
&rst
ixpk= 0, nxpk= 0, iat= 479, 482, r1= 1.97, r2= 2.47, r3= 3.03, r4= 3.53, &end
#
# 15  CYT  H3'   15  CYT  H2'   2.11  2.69
&rst
ixpk= 0, nxpk= 0, iat= 479, 481, r1= 1.61, r2= 2.11, r3= 2.69, r4= 3.19, &end
#
# 16  THY  H6    15  CYT  H1'   4.33  5.07  change

```

&rst

ixpk= 0, nxpk= 0, iat= 498, 465, r1= 3.83, r2= 4.53, r3= 5.27, r4= 5.57, &end

#

# 16 THY H6 15 CYT H2' 3.38 4.14

&rst

ixpk= 0, nxpk= 0, iat= 498, 481, r1= 2.88, r2= 3.38, r3= 4.14, r4= 4.64, &end

#

# 16 THY H2' 16 THY H1' 2.28 2.78

&rst

ixpk= 0, nxpk= 0, iat= 513, 495, r1= 1.78, r2= 2.28, r3= 2.78, r4= 3.28, &end

#

# 17 THY H6 16 THY H2" 2.9 4.9

&rst

ixpk= 0, nxpk= 0, iat= 530, 514, r1= 2.40, r2= 2.90, r3= 4.90, r4= 5.40, &end

#

# 17 THY H3' 17 THY H2" 2.79 3.41

&rst

ixpk= 0, nxpk= 0, iat= 543, 546, r1= 2.29, r2= 2.79, r3= 3.41, r4= 3.91, &end

#

# 17 THY H2' 17 THY H1' 2.86 3.5

&rst

ixpk= 0, nxpk= 0, iat= 545, 527, r1= 2.36, r2= 2.86, r3= 3.50, r4= 4.00, &end

#

# 19 THY H2' 19 THY H6 1.73 2.27 change

&rst

ixpk= 0, nxpk= 0, iat= 610, 595, r1= 1.23, r2= 1.93, r3= 2.67, r4= 2.77, &end

#

```

# 19  THY  H3'  19  THY  H2"  2.41  2.95
&rst
ixpk= 0, nxpk= 0, iat= 608, 611, r1= 1.91, r2= 2.41, r3= 2.95, r4= 3.45, &end
#
# 20  CYT  H3'  20  CYT  H2"  2.94  3.6
&rst
ixpk= 0, nxpk= 0, iat= 638, 641, r1= 2.44, r2= 2.94, r3= 3.60, r4= 4.10, &end
#
# 21  CYT  H6   20  CYT  H2'  3.1   3.8
&rst
ixpk= 0, nxpk= 0, iat= 657, 640, r1= 2.60, r2= 3.10, r3= 3.80, r4= 4.30, &end
#
# 21  CYT  H6   20  CYT  H2"  2.79  3.41  change
&rst
ixpk= 0, nxpk= 0, iat= 657, 641, r1= 2.29, r2= 2.59, r3= 3.21, r4= 3.91, &end
#
# 21  CYT  H4'  21  CYT  H1'  2.52  3.08  change
&rst
ixpk= 0, nxpk= 0, iat= 651, 654, r1= 2.02, r2= 2.62, r3= 3.28, r4= 3.58, &end
#
# 22  GUA  H8   21  CYT  H2"  3.56  4.24
&rst
ixpk= 0, nxpk= 0, iat= 687, 671, r1= 3.06, r2= 3.56, r3= 4.24, r4= 4.74, &end
#
# 22  GUA  H3'  22  GUA  H2"  2.54  3.06
&rst
ixpk= 0, nxpk= 0, iat= 701, 704, r1= 2.04, r2= 2.54, r3= 3.06, r4= 3.56, &end

```



```

#
# 1  CYT  H1'  1  CYT  H6  3.3  3.9
&rst
ixpk= 0, nxpk= 0, iat= 10, 13, r1= 2.80, r2= 3.30, r3= 3.90, r4= 4.40,
&end
#
# 1  CYT  H3'  1  CYT  H2"  2.27  2.73
&rst
ixpk= 0, nxpk= 0, iat= 24, 27, r1= 1.77, r2= 2.27, r3= 2.73, r4= 3.23, &end
#
# 2  GUA  H8  1  CYT  H3'  4.12  4.88  change
&rst
ixpk= 0, nxpk= 0, iat= 43, 24, r1= 3.62, r2= 4.12, r3= 5.28, r4= 5.38, &end
#
# 4  ADE  H8  3  GUA  H2"  2.45  2.99
&rst
ixpk= 0, nxpk= 0, iat= 109, 93, r1= 1.95, r2= 2.45, r3= 2.99, r4= 3.49, &end
#
# 4  ADE  H8  3  GUA  H2'  3.16  3.86
&rst
ixpk= 0, nxpk= 0, iat= 109, 92, r1= 2.66, r2= 3.16, r3= 3.86, r4= 4.36, &end
#
# 4  ADE  H2"  4  ADE  H8  3.34  4.08
&rst
ixpk= 0, nxpk= 0, iat= 125, 109, r1= 2.84, r2= 3.34, r3= 4.08, r4= 4.58, &end
#
# 4  ADE  H2"  4  ADE  H8  3.2  3.9

```

&rst

ixpk= 0, nxpk= 0, iat= 125, 109, r1= 2.70, r2= 3.20, r3= 3.90, r4= 4.40, &end

#

# 7 ADE H8 6 NIR H2" 0.95 3.55

&rst

ixpk= 0, nxpk= 0, iat= 213, 171, r1= 0.45, r2= 0.95, r3= 3.55, r4= 4.05, &end

#

# 9 ADE H5" 9 ADE H3' 1.85 2.25 change

&rst

ixpk= 0, nxpk= 0, iat= 270, 291, r1= 1.35, r2= 1.85, r3= 2.55, r4= 2.75, &end

#

# 9 ADE H2" 9 ADE H8 4.02 4.98

&rst

ixpk= 0, nxpk= 0, iat= 294, 278, r1= 3.52, r2= 3.72, r3= 4.48, r4= 5.48, &end

#

# 9 ADE H2' 9 ADE H8 2.09 2.51

&rst

ixpk= 0, nxpk= 0, iat= 293, 278, r1= 1.59, r2= 2.09, r3= 2.51, r4= 3.01, &end

#

# 10 ADE H2" 10 ADE H2' 1.76 2.24

&rst

ixpk= 0, nxpk= 0, iat= 326, 325, r1= 1.26, r2= 1.76, r3= 2.24, r4= 2.74, &end

#

# 11 GUA H2" 11 GUA H2' 1.78 2.22

# &rst

# ixpk= 0, nxpk= 0, iat= 359, 358, r1= 1.28, r2= 1.78, r3= 2.22, r4= 2.72, &end

#

```

# 12  CYT  H2"  12  CYT  H2'  1.77  2.23
&rst
  ixpk= 0, nxpk= 0, iat= 388, 387, r1= 1.27, r2= 1.77, r3= 2.23, r4= 2.73, &end
#
# 13  THY  H3'  13  THY  H2"  2.56  3.14
&rst
  ixpk= 0, nxpk= 0, iat= 417, 420, r1= 2.06, r2= 2.56, r3= 3.14, r4= 3.64, &end
#
# 14  THY  H4'  13  THY  H1'  3.62  4.38
&rst
  ixpk= 0, nxpk= 0, iat= 430, 401, r1= 3.12, r2= 3.62, r3= 4.38, r4= 4.88, &end
#
# 14  THY  H2'  14  THY  H6    2.2   2.68
&rst
  ixpk= 0, nxpk= 0, iat= 451, 436, r1= 1.70, r2= 2.20, r3= 2.68, r4= 3.18, &end
#
# 14  THY  H2"  14  THY  H2'  1.77  2.23
&rst
  ixpk= 0, nxpk= 0, iat= 452, 451, r1= 1.27, r2= 1.77, r3= 2.23, r4= 2.73, &end
#
# 15  CYT  H6    14  THY  H6    4.15  4.85  change
&rst
  ixpk= 0, nxpk= 0, iat= 468, 436, r1= 3.65, r2= 4.15, r3= 5.05, r4= 5.35, &end
#
# 16  THY  H2"  16  THY  H6    2.49  3.05
# &rst
# ixpk= 0, nxpk= 0, iat= 514, 498, r1= 1.99, r2= 2.49, r3= 3.05, r4= 3.55, &end

```

```

#
# 16  THY  H5"  16  THY  H6  4.99  6.09
&rst
ixpk= 0, nxpk= 0, iat= 490, 498, r1= 4.49, r2= 4.99, r3= 6.09, r4= 6.59, &end
#
# 17  THY  H3'  17  THY  H4'  2.08  2.54  change
&rst
ixpk= 0, nxpk= 0, iat= 543, 524, r1= 1.58, r2= 2.38, r3= 3.04, r4= 3.14, &end
#
# 18  GUA  H2'  18  GUA  H8  1.9  3.7
&rst
ixpk= 0, nxpk= 0, iat= 578, 562, r1= 1.40, r2= 1.90, r3= 3.70, r4= 4.20, &end
#
# 18  GUA  H2"  18  GUA  H8  2.99  3.61
&rst
ixpk= 0, nxpk= 0, iat= 579, 562, r1= 2.49, r2= 2.99, r3= 3.61, r4= 4.11, &end
#
# 20  CYT  H6  19  THY  H2'  2.99  3.61  change
&rst
ixpk= 0, nxpk= 0, iat= 627, 610, r1= 2.49, r2= 2.79, r3= 3.61, r4= 4.11, &end
#
# 20  CYT  H2'  20  CYT  H6  2.01  2.59
&rst
ixpk= 0, nxpk= 0, iat= 640, 627, r1= 1.51, r2= 2.01, r3= 2.59, r4= 3.09, &end
#
# 20  CYT  H2"  20  CYT  H6  3.18  3.82  change
&rst

```

```

ixpk= 0, nxpk= 0, iat= 641, 627, r1= 2.68, r2= 3.38, r3= 4.12, r4= 4.32, &end
#
# 20  CYT  H3'  20  CYT  H2'  2.06  2.52
&rst
ixpk= 0, nxpk= 0, iat= 638, 640, r1= 1.56, r2= 2.06, r3= 2.52, r4= 3.02, &end
#
# 21  CYT  H4'  21  CYT  H6  4.31  5.27
&rst
ixpk= 0, nxpk= 0, iat= 651, 657, r1= 3.81, r2= 4.31, r3= 5.27, r4= 5.77, &end
#
# 21  CYT  H5"  21  CYT  H6  4.4  5.6
&rst
ixpk= 0, nxpk= 0, iat= 649, 657, r1= 3.90, r2= 4.40, r3= 5.60, r4= 6.10, &end
#
# 21  CYT  H2'  21  CYT  H6  2.23  2.77  change
&rst
ixpk= 0, nxpk= 0, iat= 670, 657, r1= 1.73, r2= 2.03, r3= 2.77, r4= 3.27, &end
#
# 22  GUA  H2"  21  CYT  H6  2.74  3.26
# &rst
# ixpk= 0, nxpk= 0, iat= 704, 657, r1= 2.24, r2= 2.74, r3= 3.26, r4= 3.76, &end
#
# 22  GUA  H2"  22  GUA  H2'  1.76  2.24
&rst
ixpk= 0, nxpk= 0, iat= 704, 703, r1= 1.26, r2= 1.76, r3= 2.24, r4= 2.74, &end
#
#

```

```

# 16  THY  H1'  6    NIR  HAN  5.34  6.52  CHANGE
# &rst
#  ixpk= 0, nxpk= 0, iat= 495, 181, r1= 4.84, r2= 5.34, r3= 5.52, r4= 6.02,
#    rk2=0.5, rk3=0.5, ir6=1, ialtd=0,    &end
#
# 17  THY  M7   6    NIR  HAM2 4.4   5.6
&rst
  ixpk= 0, nxpk= 0, iat= -1, 186, r1= 2.59, r2= 2.60, r3= 6.73, r4= 7.23,
  igr1= 533, 534, 535,
&end
#
# 18  GUA  H1'  6    NIR  HAM2 5.74  7.02
# &rst
#  ixpk= 0, nxpk= 0, iat= 559, 186, r1= 5.24, r2= 5.74, r3= 7.02, r4= 7.52, &end
#
# 19  THY  H6   6    NIR  HAM2 3.65  4.47
# &rst
#  ixpk= 0, nxpk= 0, iat= 595, 186, r1= 3.15, r2= 3.65, r3= 4.47, r4= 4.97, &end
#
# 19  THY  H2'  6    NIR  HAM1 3.84  4.7
# &rst
#  ixpk= 0, nxpk= 0, iat= 610, 185, r1= 3.34, r2= 3.84, r3= 4.70, r4= 5.20, &end
#
# 19  THY  M7   6    NIR  HAM1 4.17  5.09
# &rst
#  ixpk= 0, nxpk= 0, iat= -1, 185, r1= 3.67, r2= 4.17, r3= 6.11, r4= 6.61,
#  igr1= 598, 599, 600,

```

```

# &end
#
# 19  THY  H1'  6    NIR  HAM1 3.91  4.79
# &rst
#  ixpk= 0, nxpk= 0, iat= 592, 185, r1= 3.41, r2= 3.91, r3= 4.79, r4= 5.29, &end
#
# 20  CYT  H1'  6    NIR  HAM1 3.5   4.28
# &rst
#  ixpk= 0, nxpk= 0, iat= 624, 185, r1= 3.00, r2= 3.50, r3= 4.28, r4= 4.78, &end
#
# 7   ADE  H2   6    NIR  HAM2 4.04  4.94
# &rst
#  ixpk= 0, nxpk= 0, iat= 222, 186, r1= 3.54, r2= 4.04, r3= 4.94, r4= 5.44, &end
#
# 7   ADE  H2   6    NIR  HAN  4.9   6.3
# &rst
#  ixpk= 0, nxpk= 0, iat= 222, 181, r1= 2.50, r2= 2.80, r3= 6.10, r4= 6.40, &end
#
# 6   ADE  HAO2 6    NIR  H2   4.9   6.3
&rst
  ixpk= 0, nxpk= 0, iat= 189, 179, r1= 2.50, r2= 2.80, r3= 6.10, r4= 6.40, &end
#
# 6   ADE  HAO1 6    NIR  H2   4.9   6.3
&rst
  ixpk= 0, nxpk= 0, iat= 188, 179, r1= 2.50, r2= 2.80, r3= 6.10, r4= 6.40, &end
#
# 6   ADE  HAO2 16   THY  CH3  4.9   6.3

```

&rst

ixpk= 0, nxpk= 0, iat= 189, 495, r1= 2.50, r2= 2.80, r3= 6.10, r4= 6.40, &end

#

# 6 ADE HAL X H2 XXX 4.9 6.3

&rst

ixpk= 0, nxpk= 0, iat= 183, 179, r1= 2.50, r2= 2.80, r3= 6.10, r4= 6.40, &end

#

# X ADE HAN X NIR H2 4.9 6.3

&rst

ixpk= 0, nxpk= 0, iat= 181, 179, r1= 2.50, r2= 2.80, r3= 6.10, r4= 6.40, &end

#

# X ADE HAL 7 NIR H2 4.9 6.3

# &rst

# ixpk= 0, nxpk= 0, iat= 183, 222, r1= 2.50, r2= 2.80, r3= 6.10, r4= 6.40, &end

#

# X ADE HAL 16 NIR H1' 4.9 6.3

# &rst

# ixpk= 0, nxpk= 0, iat= 183, 495, r1= 2.50, r2= 2.80, r3= 6.10, r4= 6.40, &end

#

# X ADE HAL X NIR HAO2 4.9 6.3

&rst

ixpk= 0, nxpk= 0, iat= 183, 189, r1= 2.50, r2= 2.80, r3= 6.10, r4= 6.40, &end

#

# X ADE HAL X NIR HAO1 4.9 6.3

&rst

ixpk= 0, nxpk= 0, iat= 183, 188, r1= 2.50, r2= 2.80, r3= 6.10, r4= 6.40, &end

#



```

# X  ADE  HAN  X      NIR  HAO2 4.9   6.3
&rst
  ixpk= 0, nxpk= 0, iat= 181, 189, r1= 2.50, r2= 2.80, r3= 6.10, r4= 6.40, &end
#
# X  ADE  HAO1 X      NIR  HAN  4.9   6.3
&rst
  ixpk= 0, nxpk= 0, iat= 188, 181, r1= 2.50, r2= 2.80, r3= 6.10, r4= 6.40, &end
#
# X  ADE  HAM1 16     NIR  H1'   4.9   6.3
# &rst
# ixpk= 0, nxpk= 0, iat= 185, 495, r1= 2.50, r2= 2.80, r3= 6.10, r4= 6.40, &end
#
# X  ADE  HAM2 16     NIR  H1'   4.9   6.3
# &rst
# ixpk= 0, nxpk= 0, iat= 186, 495, r1= 2.50, r2= 2.80, r3= 6.10, r4= 6.40, &end
#
# X  ADE  HAM1 17     NIR  H1'   4.9   6.3
# &rst
# ixpk= 0, nxpk= 0, iat= 185, 527, r1= 2.50, r2= 2.80, r3= 6.10, r4= 6.40, &end
#
# X  ADE  HAM2 17     NIR  H1'   4.9   6.3
# &rst
# ixpk= 0, nxpk= 0, iat= 186, 527, r1= 2.50, r2= 2.80, r3= 6.10, r4= 6.40, &end
#
# X  ADE  HAM1 X      NIR  HAN  4.9   6.3
&rst
  ixpk= 0, nxpk= 0, iat= 185, 181, r1= 2.50, r2= 2.80, r3= 6.10, r4= 6.40, &end

```

```

#
# X  ADE  HAM2 X    N1R  HAN  4.9  6.3
&rst
ixpk= 0, nxpk= 0, iat= 186, 181, r1= 2.50, r2= 2.80, r3= 6.10, r4= 6.40, &end
#
# X  ADE  HAM1 X    N1R  HAL  4.9  6.3
&rst
ixpk= 0, nxpk= 0, iat= 185, 183, r1= 2.50, r2= 2.80, r3= 6.10, r4= 6.40, &end
#
# X  ADE  HAM2 X    N1R  HAL  4.9  6.3
&rst
ixpk= 0, nxpk= 0, iat= 186, 183, r1= 2.50, r2= 2.80, r3= 6.10, r4= 6.40, &end
#
# X  ADE  HAN  5    CYT  H6   4.9  6.3
&rst
ixpk= 0, nxpk= 0, iat= 181, 141, r1= 2.50, r2= 2.80, r3= 6.10, r4= 6.40, &end
#
# X  ADE  HAO1 16   THY  H6   4.9  6.3
&rst
ixpk= 0, nxpk= 0, iat= 188, 498, r1= 2.50, r2= 2.80, r3= 6.10, r4= 6.40, &end
#
# X  ADE  HAO2 16   THY  H6   4.9  6.3
&rst
ixpk= 0, nxpk= 0, iat= 189, 498, r1= 2.50, r2= 2.80, r3= 6.10, r4= 6.40, &end
#
# X  ADE  HAO1 6    ADE  H2   4.9  6.3
&rst

```

```

ixpk= 0, nxpk= 0, iat= 188, 179, r1= 2.50, r2= 2.80, r3= 6.10, r4= 6.40, &end
#
# X   ADE   HAO2 6       ADE   H2    4.9    6.3
&rst
ixpk= 0, nxpk= 0, iat= 189, 179, r1= 2.50, r2= 2.80, r3= 6.10, r4= 6.40, &end
#
# X   ADE   HAM1 6       ADE   H2    4.9    6.3
&rst
ixpk= 0, nxpk= 0, iat= 185, 179, r1= 2.50, r2= 2.80, r3= 6.10, r4= 6.40, &end
#
# X   ADE   HAM2 6       ADE   H2    4.9    6.3
&rst
ixpk= 0, nxpk= 0, iat= 186, 179, r1= 2.50, r2= 2.80, r3= 6.10, r4= 6.40, &end
#
# X   ADE   HAM1 17      THY   H6    4.9    6.3
&rst
ixpk= 0, nxpk= 0, iat= 185, 530, r1= 2.50, r2= 2.80, r3= 6.10, r4= 6.40, &end
#
# X   ADE   HAM2 17      THY   H6    4.9    6.3
&rst
ixpk= 0, nxpk= 0, iat= 186, 530, r1= 2.50, r2= 2.80, r3= 6.10, r4= 6.40, &end
#

```

Figure S1. Atomic Charges on the *R*-N1-BDO-(61,2) Adduct Calculated Using Gaussian 03 and the Hartree-Fock, 3-21G\* basis set.

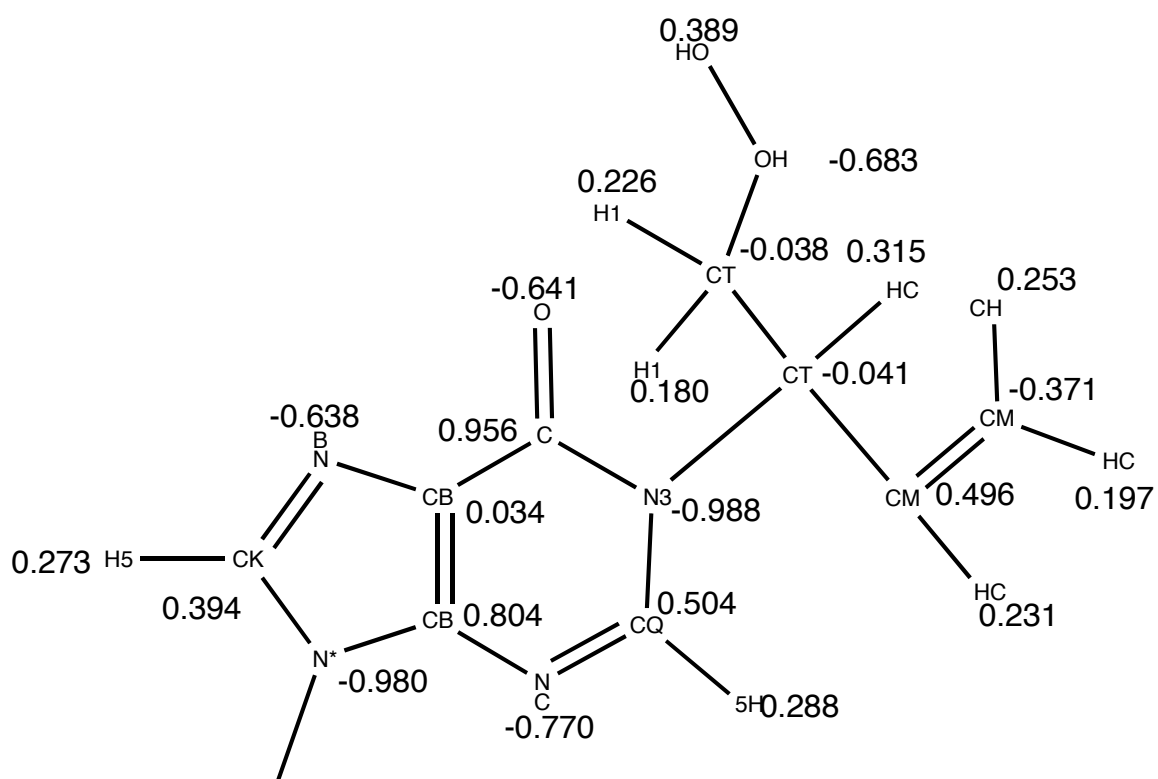

Supplement: NIHMS60537-supplement-si20050504_025.pdf [file NIHMS60537-supplement-si20050504_025.pdf]
